# Supplementary material
Source: publisher site journal article supplement (https://www.dovepress.com/article/327433)
Supplement: Supplementary file 1 [file get_supplementary_file.php]

Supplementary Material

**Table S1: Compounds Database of Four Herbs in Siwu Paste**

| MolID | MoleculeName | Formula | Structure | MW | OB(%) | DL | Attribution |
| --- | --- | --- | --- | --- | --- | --- | --- |
| MOL000023 | D-Limonene | [C10H16](https://pubchem.ncbi.nlm.nih.gov/#query=C10H16) |  | 136.26 | 39.84 | 0.02 | *Angelicae Sinensis* Radix、 |
| MOL000035 | β-selinene | [C15H24](https://pubchem.ncbi.nlm.nih.gov/#query=C15H24) |  | 204.39 | 24.39 | 0.08 | *Angelicae Sinensis* Radix、 *Ligusticum chuanxiong* Hort.、 |
| MOL000040 | Scopoletin | [C10H8O4](https://pubchem.ncbi.nlm.nih.gov/#query=C10H8O4) |  | 192.18 | 27.77 | 0.08 | *Angelicae Sinensis* Radix、 |
| MOL000069 | [palmiticacid](http://5th.tcmspw.com/molecule.php?qn=69) | [C16H32O2](https://pubchem.ncbi.nlm.nih.gov/#query=C16H32O2) |  | 256.48 | 19.3 | 0.1 | *Angelicae Sinensis* Radix、 |
| MOL000116 | [Nonanal](http://5th.tcmspw.com/molecule.php?qn=116) | [C9H18O](https://pubchem.ncbi.nlm.nih.gov/#query=C9H18O) |  | 142.27 | 40.28 | 0.02 | *Angelicae Sinensis* Radix、 |
| MOL000117 | 4-isopropyltoluene | [C10H14](https://pubchem.ncbi.nlm.nih.gov/#query=C10H14) |  | 134.24 | 27.2 | 0.02 | *Angelicae Sinensis* Radix、 |
| MOL000121 | [Decanal](http://5th.tcmspw.com/molecule.php?qn=121) | [C10H20O](https://pubchem.ncbi.nlm.nih.gov/#query=C10H20O) |  | 156.3 | 29.81 | 0.02 | *Angelicae Sinensis* Radix、 |
| MOL000125 | [(-)-alpha-Pinene](http://5th.tcmspw.com/molecule.php?qn=125) | [C10H16](https://pubchem.ncbi.nlm.nih.gov/#query=C10H16) |  | 136.26 | 46.25 | 0.05 | *Angelicae Sinensis* Radix、 |
| MOL000162 | [beta-Chamigrene](http://5th.tcmspw.com/molecule.php?qn=162) | [C15H24](https://pubchem.ncbi.nlm.nih.gov/#query=C15H24) |  | 204.39 | 31.99 | 0.08 | *Angelicae Sinensis* Radix、 |
| MOL000197 | [Myrcene](http://5th.tcmspw.com/molecule.php?qn=197) | [C10H16](https://pubchem.ncbi.nlm.nih.gov/#query=C10H16) |  | 136.26 | 24.96 | 0.02 | *Angelicae Sinensis* Radix、 |
| MOL000199 | [Safrol](http://5th.tcmspw.com/molecule.php?qn=199) | [C10H10O2](https://pubchem.ncbi.nlm.nih.gov/#query=C10H10O2) |  | 162.2 | 45.34 | 0.05 | *Angelicae Sinensis* Radix、 |
| MOL000201 | β-Ocimene | [C10H16](https://pubchem.ncbi.nlm.nih.gov/#query=C10H16) |  | 136.26 | 15.06 | 0.02 | *Angelicae Sinensis* Radix、 |
| MOL000202 | γ-Terpinene | [C10H16](https://pubchem.ncbi.nlm.nih.gov/#query=C10H16) |  | 136.26 | 33.02 | 0.02 | *Angelicae Sinensis* Radix、 |
| MOL000232 | (+)-α-Terpineol | [C10H18O](https://pubchem.ncbi.nlm.nih.gov/#query=C10H18O) |  | 154.28 | 46.3 | 0.03 | *Angelicae Sinensis* Radix、 |
| MOL000259 | Carvacrol | C10H14O |  | 150.24 | 43.28 | 0.03 | *Angelicae Sinensis* Radix、 |
| MOL000270 | (+)-3-Carene | [C10H16](https://pubchem.ncbi.nlm.nih.gov/#query=C10H16) |  | 136.26 | 45.2 | 0.04 | *Angelicae Sinensis* Radix、 |
| MOL000346 | [succinicacid](http://5th.tcmspw.com/molecule.php?qn=346) | C4H6O4 |  | 118.1 | 29.62 | 0.01 | *Angelicae Sinensis* Radix、 |
| MOL000357 | [Sitogluside](http://5th.tcmspw.com/molecule.php?qn=357) | [C35H60O6](https://pubchem.ncbi.nlm.nih.gov/#query=C35H60O6) |  | 576.95 | 20.63 | 0.62 | *Angelicae Sinensis* Radix、 *Ligusticum chuanxiong* Hort.、 *Cynanchum otophyllum* Schneid.、 *Rehmanniae radix* preparata、 |
| MOL000360 | Ferulicacid | [C10H10O4](https://pubchem.ncbi.nlm.nih.gov/#query=C10H10O4) |  | 194.2 | 39.56 | 0.06 | *Angelicae Sinensis* Radix、 |
| MOL000383 | D-Galacturonicacid | [C6H10O7](https://pubchem.ncbi.nlm.nih.gov/#query=C6H10O7) |  | 194.16 | 29.75 | 0.04 | *Angelicae Sinensis* Radix、 |
| MOL000421 | [nicotinicacid](http://5th.tcmspw.com/molecule.php?qn=421) | [C6H5NO2](https://pubchem.ncbi.nlm.nih.gov/#query=C6H5NO2) |  | 123.12 | 47.65 | 0.02 | *Angelicae Sinensis* Radix、 |
| MOL000449 | [Stigmasterol](http://5th.tcmspw.com/molecule.php?qn=449) | [C29H48O](https://pubchem.ncbi.nlm.nih.gov/#query=C29H48O) |  | 412.77 | 43.83 | 0.76 | *Angelicae Sinensis* Radix、 |
| MOL000478 | [Eucarvone](http://5th.tcmspw.com/molecule.php?qn=478) | [C10H14O](https://pubchem.ncbi.nlm.nih.gov/#query=C10H14O) |  | 150.24 | 53.14 | 0.03 | *Angelicae Sinensis* Radix、 |
| MOL000479 | β-[Farnesene](http://5th.tcmspw.com/molecule.php?qn=479) | [C15H24](https://pubchem.ncbi.nlm.nih.gov/#query=C15H24) |  | 204.39 | 17.42 | 0.05 | *Angelicae Sinensis* Radix、 |
| MOL000489 | γ-Cadinene | [C15H24](https://pubchem.ncbi.nlm.nih.gov/#query=C15H24) |  | 204.39 | 19.8 | 0.08 | *Angelicae Sinensis* Radix、 |
| MOL000635 | [vanillin](http://5th.tcmspw.com/molecule.php?qn=635) | [C8H8O3](https://pubchem.ncbi.nlm.nih.gov/#query=C8H8O3) |  | 152.16 | 52 | 0.03 | *Angelicae Sinensis* Radix、 |
| MOL000967 | β-Bergamotene | [C15H24](https://pubchem.ncbi.nlm.nih.gov/#query=C15H24) |  | 204.39 | 28.51 | 0.09 | *Angelicae Sinensis* Radix、 |
| MOL000974 | Cuminaldehyde | [C10H12O](https://pubchem.ncbi.nlm.nih.gov/#query=C10H12O) |  | 148.22 | 38.29 | 0.03 | *Angelicae Sinensis* Radix、 |
| MOL001273 | (+)-Verbenone | [C10H14O](https://pubchem.ncbi.nlm.nih.gov/#query=C10H14O) |  | 150.24 | 50.63 | 0.06 | *Angelicae Sinensis* Radix、 |
| MOL001302 | sebacicacid | [C10H18O4](https://pubchem.ncbi.nlm.nih.gov/#query=C10H18O4) |  | 202.28 | 16.23 | 0.05 | *Angelicae Sinensis* Radix、 |
| MOL001306 | 2-Hydroxy-5-methylacetophenone | [C9H10O2](https://pubchem.ncbi.nlm.nih.gov/#query=C9H10O2) |  | 150.19 | 24.96 | 0.03 | *Angelicae Sinensis* Radix、*Ligusticum chuanxiong* Hort. |
| MOL001314 | [Azelex](http://5th.tcmspw.com/molecule.php?qn=1314) | [C9H16O4](https://pubchem.ncbi.nlm.nih.gov/#query=C9H16O4) |  | 188.25 | 16.9 | 0.04 | *Angelicae Sinensis* Radix、 |
| MOL001388 | [(+)-Ledol](http://5th.tcmspw.com/molecule.php?qn=1388) | [C15H26O](https://pubchem.ncbi.nlm.nih.gov/#query=C15H26O) |  | 222.41 | 16.96 | 0.12 | *Angelicae Sinensis* Radix、 |
| MOL001578 | 1-Phenylethanone | [C8H8O](https://pubchem.ncbi.nlm.nih.gov/#query=C8H8O) |  | 120.16 | 48.19 | 0.02 | *Angelicae Sinensis* Radix、 |
| MOL001640 | Decanoicacid | [C10H20O2](https://pubchem.ncbi.nlm.nih.gov/#query=C10H20O2) |  | 172.3 | 26.74 | 0.03 | *Angelicae Sinensis* Radix、 |
| MOL001788 | [adenine](http://5th.tcmspw.com/molecule.php?qn=1788) | [C5H5O5](https://pubchem.ncbi.nlm.nih.gov/#query=C10H20O2) |  | 135.15 | 62.81 | 0.03 | *Angelicae Sinensis* Radix、 |
| MOL002029 | (+)-Cuparene | [C15H22](https://pubchem.ncbi.nlm.nih.gov/#query=C15H22) |  | 202.37 | 38.26 | 0.07 | *Angelicae Sinensis* Radix、 |
| MOL002033 | [cis-Thujopsene](http://5th.tcmspw.com/molecule.php?qn=2033) | [C15H24](https://pubchem.ncbi.nlm.nih.gov/#query=C15H24) |  | 204.39 | 56.43 | 0.12 | *Angelicae Sinensis* Radix、 |
| MOL002098 | senkyunolideB | [C12H12O3](https://pubchem.ncbi.nlm.nih.gov/#query=C15H24) |  | 204.24 | 62.68 | 0.08 | *Angelicae Sinensis* Radix、 *Ligusticum chuanxiong* Hort.、 |
| MOL002102 | [LevistolidA](http://5th.tcmspw.com/molecule.php?qn=2102) | C24H28O4 |  | 380.52 | 2.15 | 0.82 | *Angelicae Sinensis* Radix、*Ligusticum chuanxiong* Hort. |
| MOL002110 | [Allocymene](http://5th.tcmspw.com/molecule.php?qn=2110) | [C10H16](https://pubchem.ncbi.nlm.nih.gov/#query=C10H16) |  | 136.26 | 14.89 | 0.02 | *Angelicae Sinensis* Radix、 |
| MOL002111 | [Ligusticumlactone](http://www.baidu.com/link?url=pi6K2dPxPSCljc9xGjK_MCFFgzbScqaRuTIhH7d9GDi395vKqSFYXF9alZ3JfEkGU4X2tn6VNx3l4TwYzYaOUv14LL_tDYmUQ_jEP5wyA-q) | [C12H12O2](https://pubchem.ncbi.nlm.nih.gov/#query=C12H12O2) |  | 188.24 | 42.44 | 0.07 | *Angelicae Sinensis* Radix、*Ligusticum chuanxiong* Hort. |
| MOL002143 | [senkyunolide-C](http://5th.tcmspw.com/molecule.php?qn=2143) | C12H12O3 |  | 204.24 | 46.8 | 0.08 | *Angelicae Sinensis* Radix、  *Ligusticum chuanxiong* Hort. |
| MOL002144 | [senkyunolide-D](http://5th.tcmspw.com/molecule.php?qn=2144) | C14H14O4 |  | 222.26 | 79.13 | 0.1 | *Angelicae Sinensis* Radix、  *Ligusticum chuanxiong* Hort. |
| MOL002145 | [senkyunolide-E](http://5th.tcmspw.com/molecule.php?qn=2145) | [C12H12O3](https://pubchem.ncbi.nlm.nih.gov/search/#query=C12H12O3) |  | 204.24 | 34.4 | 0.08 | *Angelicae Sinensis* Radix、  *Ligusticum chuanxiong* Hort. |
| MOL002180 | 4-Octanone | [C8H16O](https://pubchem.ncbi.nlm.nih.gov/#query=C8H16O) |  | 128.24 | 19.37 | 0.01 | *Angelicae Sinensis* Radix、  *Ligusticum chuanxiong* Hort. |
| MOL002184 | (6R)-6-butylcyclohepta-1,4-diene | [C11H18](https://pubchem.ncbi.nlm.nih.gov/search/#query=C11H18) |  | 150.29 | 31.69 | 0.02 | *Angelicae Sinensis* Radix、  *Ligusticum chuanxiong* Hort. |
| MOL002480 | 2-Methyl-3-buten-2-OL | [C5H10O](https://pubchem.ncbi.nlm.nih.gov/#query=C5H10O) |  | 86.15 | 54.58 | 0.01 | *Angelicae Sinensis* Radix、 |
| MOL002830 | 4-methylphenol | [C7H8O](https://pubchem.ncbi.nlm.nih.gov/#query=C7H8O) |  | 108.15 | 51.99 | 0.01 | *Angelicae Sinensis* Radix、 |
| MOL002972 | Beta-Bisabolene | C15H24 |  | 204.39 | 20.3 | 0.06 | *Angelicae Sinensis* Radix、 |
| MOL002983 | [Guasol](http://5th.tcmspw.com/molecule.php?qn=2983) | [C7H8O2](https://pubchem.ncbi.nlm.nih.gov/#query=C7H8O2) |  | 124.15 | 51.6 | 0.02 | *Angelicae Sinensis* Radix、 |
| MOL003534 | β--Cadinene | [C15H24](https://pubchem.ncbi.nlm.nih.gov/#query=C15H24) |  | 204.39 | 17.12 | 0.08 | *Angelicae Sinensis* Radix、 |
| MOL003587 | α-Acoradiene | C15H24 |  | 204.39 | 36.73 | 0.07 | *Angelicae Sinensis* Radix、*Ligusticum chuanxiong* Hort. |
| MOL004474 | 4-Ethylphenol | [C8H10O](https://pubchem.ncbi.nlm.nih.gov/#query=C8H10O) |  | 122.18 | 48.44 | 0.02 | *Angelicae Sinensis* Radix、 |
| MOL004479 | 2-Methylphenol | [C7H8O](https://pubchem.ncbi.nlm.nih.gov/#query=C7H8O) |  | 108.15 | 62.45 | 0.02 | *Angelicae Sinensis* Radix、 |
| MOL004723 | β-Terpinene | [C10H16](https://pubchem.ncbi.nlm.nih.gov/#query=C10H16) |  | 136.26 | 42.29 | 0.02 | *Angelicae Sinensis* Radix、 |
| MOL004791 | 1-Hexadecanol | [C16H34O](https://pubchem.ncbi.nlm.nih.gov/#query=C16H34O) |  | 242.5 | 13.32 | 0.08 | *Angelicae Sinensis* Radix、 |
| MOL005125 | 4-Methoxybenzoicacid | [C8H8O3](https://pubchem.ncbi.nlm.nih.gov/#query=C8H8O3) |  | 152.16 | 29.69 | 0.03 | *Angelicae Sinensis* Radix、 |
| MOL005589 | 3、4-Dimethylbenzaldehyde | [C9H10O](https://pubchem.ncbi.nlm.nih.gov/#query=C9H10O) |  | 134.19 | 39.99 | 0.02 | *Angelicae Sinensis* Radix、 |
| MOL005590 | 4-Ethylbenzaldehyde | [C9H10O](https://pubchem.ncbi.nlm.nih.gov/#query=C9H10O) |  | 134.19 | 40.95 | 0.02 | *Angelicae Sinensis* Radix、 |
| MOL005608 | 2、3、5-trimethylbenzene-1、4-diol | [C9H12O2](https://pubchem.ncbi.nlm.nih.gov/#query=C9H12O2) |  | 152.21 | 54.42 | 0.03 | *Angelicae Sinensis* Radix、 |
| MOL006869 | 2、4-Dihydroxyacetophenone | [C8H8O3](https://pubchem.ncbi.nlm.nih.gov/#query=C8H8O3) |  | 152.16 | 36.49 | 0.03 | *Angelicae Sinensis* Radix、 |
| MOL007745 | o-Phthalicacid | [C8H6O4](https://pubchem.ncbi.nlm.nih.gov/#query=C8H6O4) |  | 166.14 | 17.74 | 0.04 | *Angelicae Sinensis* Radix、 |
| MOL008250 | Phthalicanhydride | [C8H4O3](https://pubchem.ncbi.nlm.nih.gov/#query=C8H4O3) |  | 148.12 | 47.31 | 0.04 | *Angelicae Sinensis* Radix、 |
| MOL008251 | Sedanolide | C12H18O2 |  | 194.3 | 62.46 | 0.07 | *Angelicae Sinensis* Radix、 |
| MOL008252 | [senkyunolide](http://5th.tcmspw.com/molecule.php?qn=8252) A | [C12H16O2](https://pubchem.ncbi.nlm.nih.gov/#query=C12H16O2) |  | 192.28 | 68.28 | 0.07 | *Angelicae Sinensis* Radix、 |
| MOL008265 | Ligusticumicacid | [C12H14O3](https://pubchem.ncbi.nlm.nih.gov/#query=C12H14O3) |  | 206.26 | 78.26 | 0.06 | *Angelicae Sinensis* Radix、 |
| MOL008266 | [(Z)-2-Hexenylhexanoate](http://5th.tcmspw.com/molecule.php?qn=8266) | [C12H22O2](https://pubchem.ncbi.nlm.nih.gov/#query=C12H22O2) |  | 198.34 | 19.39 | 0.04 | *Angelicae Sinensis* Radix、 |
| MOL008267 | 2-Methylhexadecanoicacid | [C17H34O2](https://pubchem.ncbi.nlm.nih.gov/search/#query=C17H34O2) |  | 270.51 | 20.23 | 0.11 | *Angelicae Sinensis* Radix、 |
| MOL008268 | isoeugenol | [C10H12O2](https://pubchem.ncbi.nlm.nih.gov/#query=C10H12O2) |  | 164.22 | 20.73 | 0.04 | *Angelicae Sinensis* Radix、 |
| MOL008270 | [2-methyldodecan-5-one](http://5th.tcmspw.com/molecule.php?qn=8270) | [C13H26O](https://pubchem.ncbi.nlm.nih.gov/#query=C13H26O) |  | 198.39 | 13.16 | 0.04 | *Angelicae Sinensis* Radix、 |
| MOL008273 | [4-Methyl-6-hepten-3-one](http://5th.tcmspw.com/molecule.php?qn=8273) | [C8H14O](https://pubchem.ncbi.nlm.nih.gov/#query=C8H14O) |  | 126.22 | 78.38 | 0.01 | *Angelicae Sinensis* Radix、 |
| MOL008274 | 4-Ethylresorcinol | [C8H10O2](https://pubchem.ncbi.nlm.nih.gov/#query=C8H10O2) |  | 138.18 | 46.45 | 0.03 | *Angelicae Sinensis* Radix、 |
| MOL008275 | 5-Hydroxyindole | [C8H7NO](https://pubchem.ncbi.nlm.nih.gov/#query=C8H7NO) |  | 133.16 | 63.14 | 0.03 | *Angelicae Sinensis* Radix、 |
| MOL008277 | 7、10-Pentadecadiynoicacid | [C15H22O2](https://pubchem.ncbi.nlm.nih.gov/#query=C15H22O2) |  | 234.37 | 41.5 | 0.09 | *Angelicae Sinensis* Radix、 |
| MOL008279 | [6-Undecanone](http://www.baidu.com/link?url=icwayVXVTC9Xiq10l7ndOHmveNiuIpugE2fcWTf8hY7GD7rQp0W5hhse16a65fhe3vFYh0nwcFf0d7waY66vrgw3W0u4deSzrpF7uWVv_a3) | [C11H22O](https://pubchem.ncbi.nlm.nih.gov/#query=C11H22O) |  | 170.33 | 18.65 | 0.02 | *Angelicae Sinensis* Radix、 |
| MOL008280 | isoamylbenzene | [C11H16](https://pubchem.ncbi.nlm.nih.gov/#query=C11H16) |  | 148.27 | 35.69 | 0.03 | *Angelicae Sinensis* Radix、 |
| MOL008281 | 2-Butenoicacid | [C10H14O4](https://pubchem.ncbi.nlm.nih.gov/#query=C10H14O4) |  | 198.24 | 77.1 | 0.04 | *Angelicae Sinensis* Radix、 |
| MOL008282 | Tropone | [C7H6O](https://pubchem.ncbi.nlm.nih.gov/#query=C7H6O) |  | 106.13 | 47.41 | 0.01 | *Angelicae Sinensis* Radix、 |
| MOL008283 | alloaromadendrene | [C15H24](https://pubchem.ncbi.nlm.nih.gov/#query=C15H24) |  | 204.39 | 18.21 | 0.1 | *Angelicae Sinensis* Radix、 |
| MOL008284 | [butyricacid](http://www.baidu.com/link?url=Qg-enhNK7LN0OS3o5QUVDPPXWguYUmaL6wsS9ykV-hSwxy-5OQhlmTqwcH7C1CA932h6tZO9Qf7bjDPbGVUU6z8c5jhXirZfs--FsuAL8mq) | [C4H8O2](https://pubchem.ncbi.nlm.nih.gov/#query=C4H8O2) |  | 88.12 | 21.62 | 0 | *Angelicae Sinensis* Radix、 |
| MOL008285 | (3S)-Butylphthalide | [C12H14O2](https://pubchem.ncbi.nlm.nih.gov/#query=C12H14O2) |  | 190.26 | 55.05 | 0.07 | *Angelicae Sinensis* Radix、 |
| MOL008286 | D-(+)-Camphoricacid | [C10H16O4](https://pubchem.ncbi.nlm.nih.gov/#query=C10H16O4) |  | 200.26 | 99.13 | 0.07 | *Angelicae Sinensis* Radix、 |
| MOL008287 | [(3E)-3-butylidene-7-hydroxy-2-benzofuran-1-one](http://5th.tcmspw.com/molecule.php?qn=8287) | [C12H12O3](https://pubchem.ncbi.nlm.nih.gov/#query=C12H12O3) |  | 204.24 | 42.17 | 0.08 | *Angelicae Sinensis* Radix、 |
| MOL008288 | [Coniferylferulate](http://5th.tcmspw.com/molecule.php?qn=8288) | [C20H20O6](https://pubchem.ncbi.nlm.nih.gov/#query=C20H20O6) |  | 356.4 | 4.54 | 0.39 | *Angelicae Sinensis* Radix、 |
| MOL008291 | 2、4-Dimethylbenzaldehyde | [C9H10O](https://pubchem.ncbi.nlm.nih.gov/#query=C9H10O) |  | 134.19 | 39.33 | 0.03 | *Angelicae Sinensis* Radix、 |
| MOL008292 | 3-Ethylphenol | [C8H10O](https://pubchem.ncbi.nlm.nih.gov/#query=C8H10O) |  | 122.18 | 51.3 | 0.02 | *Angelicae Sinensis* Radix、 |
| MOL002201 | cis-ligustilide | [C12H14O2](https://pubchem.ncbi.nlm.nih.gov/#query=C12H14O2) |  | 190.26 | 51.3 | 0.07 | *Angelicae Sinensis* Radix  *Ligusticum chuanxiong* Hort. |
| MOL000103 | 4-Hydroxybenzoic acid | [C7H6O3](https://pubchem.ncbi.nlm.nih.gov/#query=C7H6O3) |  | 138.13 | 30.15 | 0.03 | *Ligusticum chuanxiong* Hort. |
| MOL000114 | [vanillic acid](http://5th.tcmspw.com/molecule.php?qn=114) | [C8H8O](https://pubchem.ncbi.nlm.nih.gov/#query=C8H8O4)4 |  | 168.16 | 35.47 | 0.04 | *Ligusticum chuanxiong* Hort. |
| MOL001210 | phellandral | [C10H16O](https://pubchem.ncbi.nlm.nih.gov/#query=C10H16O) |  | 152.26 | 40.36 | 0.03 | *Ligusticum chuanxiong* Hort. |
| MOL001223 | Campholenaldehyde | [C10H16O](https://pubchem.ncbi.nlm.nih.gov/#query=C10H16O) |  | 152.26 | 45.18 | 0.03 | *Ligusticum chuanxiong* Hort. |
| MOL001390 | Globulol | [C15H26O](https://pubchem.ncbi.nlm.nih.gov/#query=C15H26O) |  | 222.41 | 85.51 | 0.12 | *Ligusticum chuanxiong* Hort. |
| MOL000172 | 2-furaldehyde | [C5H4O2](https://pubchem.ncbi.nlm.nih.gov/#query=C5H4O2) |  | 96.09 | 34.35 | 0.01 | *Ligusticum chuanxiong* Hort. |
| MOL001729 | Chrysophanol | [C15H10O4](https://pubchem.ncbi.nlm.nih.gov/#query=C15H10O4) |  | 254.25 | 18.64 | 0.21 | *Ligusticum chuanxiong* Hort. |
| MOL001744 | 2、4-Dihydroxypyrimidine | [C4H4N2O2](https://pubchem.ncbi.nlm.nih.gov/#query=C4H4N2O2) |  | 112.1 | 42.53 | 0.02 | *Ligusticum chuanxiong* Hort. |
| MOL001752 | 4-vinylguaiacol | [C9H10O2](https://pubchem.ncbi.nlm.nih.gov/#query=C9H10O2) |  | 150.19 | 38.39 | 0.03 | *Ligusticum chuanxiong* Hort. |
| MOL000019 | Camphene | C11H16 |  | 136.26 | 34.98 | 0.04 | *Ligusticum chuanxiong* Hort. |
| MOL000198 | linalool | [C10H18O](https://pubchem.ncbi.nlm.nih.gov/#query=C10H18O) |  | 154.28 | 39.8 | 0.02 | *Ligusticum chuanxiong* Hort. |
| MOL000204 | β-elemene | [C15H24](https://pubchem.ncbi.nlm.nih.gov/#query=C15H24) |  | 204.39 | 28.62 | 0.06 | *Ligusticum chuanxiong* Hort. |
| MOL002042 | Thymol | [C10H14O](https://pubchem.ncbi.nlm.nih.gov/#query=C10H14O) |  | 150.24 | 41.47 | 0.03 | *Ligusticum chuanxiong* Hort. |
| MOL000208 | Aromadendrene | [C15H24](https://pubchem.ncbi.nlm.nih.gov/#query=C15H24) |  | 204.39 | 55.74 | 0.1 | *Ligusticum chuanxiong* Hort. |
| MOL002097 | 1、1-Dimethylcyclopentane | [C7H14](https://pubchem.ncbi.nlm.nih.gov/#query=C7H14) |  | 98.21 | 41.22 | 0.01 | *Ligusticum chuanxiong* Hort. |
| MOL002099 | [Senkyunolide-K](http://5th.tcmspw.com/molecule.php?qn=2099) | [C12H16O3](https://pubchem.ncbi.nlm.nih.gov/#query=C12H16O3) |  | 208.28 | 61.75 | 0.08 | *Ligusticum chuanxiong* Hort. |
| MOL002100 | [(3Z、6S、7R)-3-butylidene-6-butyryl-7-hydroxy-4、5、6、7-tetrahydroisobenzofuran-1-one](http://5th.tcmspw.com/molecule.php?qn=2100) | [C16H22O4](https://pubchem.ncbi.nlm.nih.gov/#query=C16H22O4) |  | 278.38 | 3.41 | 0.16 | *Ligusticum chuanxiong* Hort. |
| MOL002101 | Senkyunolide N | [C12H18O4](https://pubchem.ncbi.nlm.nih.gov/#query=C12H18O4) |  | 226.3 | 37.27 | 0.1 | *Ligusticum chuanxiong* Hort. |
| MOL002103 | Senkyunolid P | C24H30O4 |  | 382.54 | 9.38 | 0.81 | *Ligusticum chuanxiong* Hort. |
| MOL002105 | [Senkyunolide-R](http://5th.tcmspw.com/molecule.php?qn=2105) | [C12H16O5](https://pubchem.ncbi.nlm.nih.gov/search/#query=C12H16O5) |  | 240.28 | 13.14 | 0.11 | *Ligusticum chuanxiong* Hort. |
| MOL002107 | 1-phenylpentan-1-one | [C11H14O](https://pubchem.ncbi.nlm.nih.gov/#query=C11H14O) |  | 162.25 | 42.58 | 0.03 | *Ligusticum chuanxiong* Hort. |
| MOL002109 | Riligustilide | C24H28O4 |  | 380.52 | 11.98 | 0.7 | *Ligusticum chuanxiong* Hort. |
| MOL002114 | 2-hydroxyoleanolic acid | [C30H48O4](https://pubchem.ncbi.nlm.nih.gov/#query=C30H48O4) |  | 472.78 | 21.08 | 0.74 | *Ligusticum chuanxiong* Hort. |
| MOL002117 | [β-sesquiphellandrene](http://5th.tcmspw.com/molecule.php?qn=2117) | [C15H24](https://pubchem.ncbi.nlm.nih.gov/#query=C15H24) |  | 204.39 | 23.68 | 0.06 | *Ligusticum chuanxiong* Hort. |
| MOL002123 | [Chuanxiongol](http://5th.tcmspw.com/molecule.php?qn=2123) | [C13H14O3](https://pubchem.ncbi.nlm.nih.gov/#query=C13H14O3) |  | 218.27 | 22.19 | 0.1 | *Ligusticum chuanxiong* Hort. |
| MOL002124 | β-Asarone | [C12H16O3](https://pubchem.ncbi.nlm.nih.gov/#query=C12H16O3) |  | 208.28 | 35.61 | 0.06 | *Ligusticum chuanxiong* Hort. |
| MOL002125 | Piperitol | [C10H18O](https://pubchem.ncbi.nlm.nih.gov/#query=C10H18O) |  | 154.28 | 43.26 | 0.03 | *Ligusticum chuanxiong* Hort. |
| MOL002126 | [4-Thujanol](https://www.ncbi.nlm.nih.gov/pcsubstance/?term=%224-Thujanol%22%5bCompleteSynonym%5d%20AND%206326181%5bStandardizedCID%5d) | [C10H18O](https://pubchem.ncbi.nlm.nih.gov/#query=C10H18O) |  | 154.28 | 27.22 | 0.05 | *Ligusticum chuanxiong* Hort. |
| MOL002127 | [Cnidilide](http://5th.tcmspw.com/molecule.php?qn=2127) | [C12H18O2](https://pubchem.ncbi.nlm.nih.gov/#query=C12H18O2) |  | 194.3 | 77.55 | 0.07 | *Ligusticum chuanxiong* Hort. |
| MOL002128 | [1、3、8-p-Menthatriene](http://5th.tcmspw.com/molecule.php?qn=2128) | [C10H14](https://pubchem.ncbi.nlm.nih.gov/#query=C10H14) |  | 134.24 | 35.86 | 0.02 | *Ligusticum chuanxiong* Hort. |
| MOL002134 | Isobutyrophenone | [C10H12O](https://pubchem.ncbi.nlm.nih.gov/#query=C10H12O) |  | 148.22 | 80.37 | 0.03 | *Ligusticum chuanxiong* Hort. |
| MOL002136 | [neocnidilide](http://5th.tcmspw.com/molecule.php?qn=2136) | [C12H18O](https://pubchem.ncbi.nlm.nih.gov/#query=C10H12O)2 |  | 194.3 | 83.83 | 0.07 | *Ligusticum chuanxiong* Hort. |
| MOL002140 | Perlolyrine | [C16H12N2O2](https://pubchem.ncbi.nlm.nih.gov/#query=C16H12N2O2) |  | 264.3 | 65.95 | 0.27 | *Ligusticum chuanxiong* Hort. |
| MOL002141 | pregnenolone_ | [C21H32O2](https://pubchem.ncbi.nlm.nih.gov/#query=C21H32O2) |  | 316.53 | 14.07 | 0.43 | *Ligusticum chuanxiong* Hort. |
| MOL002142 | sedanic acid | [C12H18O3](https://pubchem.ncbi.nlm.nih.gov/#query=C21H32O2) |  | 210.3 | 44.69 | 0.06 | *Ligusticum chuanxiong* Hort. |
| MOL002147 | [senkyunolide-J](http://5th.tcmspw.com/molecule.php?qn=2147) | [C12H18O4](https://pubchem.ncbi.nlm.nih.gov/search/#query=C12H18O4) |  | 226.3 | 21.14 | 0.1 | *Ligusticum chuanxiong* Hort. |
| MOL002149 | [senkyunolide-S](http://5th.tcmspw.com/molecule.php?qn=2149) | [C12H16O5](https://pubchem.ncbi.nlm.nih.gov/search/#query=C12H16O5) |  | 240.33 | 20.61 | 0.11 | *Ligusticum chuanxiong* Hort. |
| MOL002150 | [1-Acetyl-beta-carboline](http://5th.tcmspw.com/molecule.php?qn=2150) | [C13H10N2O](https://pubchem.ncbi.nlm.nih.gov/#query=C13H10N2O) |  | 210.25 | 67.12 | 0.13 | *Ligusticum chuanxiong* Hort. |
| MOL002151 | senkyunone | [C22H30O2](https://pubchem.ncbi.nlm.nih.gov/#query=C22H30O2) |  | 326.52 | 47.66 | 1.15 | *Ligusticum chuanxiong* Hort. |
| MOL002152 | Sinapic Acid | [C11H12O5](https://pubchem.ncbi.nlm.nih.gov/#query=C11H12O5) |  | 224.23 | 64.15 | 0.08 | *Ligusticum chuanxiong* Hort. |
| MOL002153 | spathulenol | [C15H24O](https://pubchem.ncbi.nlm.nih.gov/#query=C15H24O) |  | 220.39 | 82.33 | 0.12 | *Ligusticum chuanxiong* Hort. |
| MOL002158 | xiongterpene | [C39H54O5](https://pubchem.ncbi.nlm.nih.gov/#query=C39H54O5) |  | 574.87 | 23.77 | 0.42 | *Ligusticum chuanxiong* Hort. |
| MOL002162 | 2-Propionylfuran | [C7H8O2](https://pubchem.ncbi.nlm.nih.gov/#query=C7H8O2) |  | 124.15 | 63.12 | 0.02 | *Ligusticum chuanxiong* Hort. |
| MOL002164 | (1R)-2、2、3-Trimethylcyclopent-3-ene-1-carbaldehyde | [C9H14O](https://pubchem.ncbi.nlm.nih.gov/#query=C9H14O) |  | 138.23 | 42.64 | 0.03 | *Ligusticum chuanxiong* Hort. |
| MOL002165 | Methyl 2-pentanoylbenzoate | [C13H16O3](https://pubchem.ncbi.nlm.nih.gov/#query=C13H16O3) |  | 220.29 | 69.28 | 0.07 | *Ligusticum chuanxiong* Hort. |
| MOL002167 | Methyl 2-furoate | [C6H6O3](https://pubchem.ncbi.nlm.nih.gov/#query=C6H6O3) |  | 126.12 | 49.41 | 0.02 | *Ligusticum chuanxiong* Hort. |
| MOL002170 | (4S、6S)-cis-Carveol | [C10H16O](https://pubchem.ncbi.nlm.nih.gov/#query=C10H16O) |  | 152.26 | 32.5 | 0.03 | *Ligusticum chuanxiong* Hort. |
| MOL002171 | [2-Methylbenzoxazol](http://5th.tcmspw.com/molecule.php?qn=2171) | [C8H7NO](https://pubchem.ncbi.nlm.nih.gov/#query=C8H7NO) |  | 133.16 | 65.25 | 0.03 | *Ligusticum chuanxiong* Hort. |
| MOL002172 | 5、6-Dimethyltetrahydropyran-2-one | [C7H12O2](https://pubchem.ncbi.nlm.nih.gov/#query=C7H12O2) |  | 128.19 | 48.07 | 0.02 | *Ligusticum chuanxiong* Hort. |
| MOL002175 | (1S)-3-Cyclohexene-1alpha-ol | [C6H10O](https://pubchem.ncbi.nlm.nih.gov/#query=C6H10O) |  | 98.16 | 70.57 | 0.01 | *Ligusticum chuanxiong* Hort. |
| MOL002176 | [Methyl 3-furoate](http://5th.tcmspw.com/molecule.php?qn=2176) | C6H6O3 |  | 126.12 | 77.82 | 0.02 | *Ligusticum chuanxiong* Hort. |
| MOL002178 | [4、7-Dihydroxy-3-butylphthalide](http://5th.tcmspw.com/molecule.php?qn=2178) | [C12H14O4](https://pubchem.ncbi.nlm.nih.gov/#query=C12H14O4) |  | 222.26 | 106.09 | 0.1 | *Ligusticum chuanxiong* Hort. |
| MOL002181 | 4-hydroxy-3-butylphthalide | [C12H14O3](https://pubchem.ncbi.nlm.nih.gov/#query=C12H14O4) |  | 206.26 | 70.31 | 0.08 | *Ligusticum chuanxiong* Hort. |
| MOL002183 | 5-Propyl-2-thiouracil | [C7H10N2OS](https://pubchem.ncbi.nlm.nih.gov/#query=C7H10N2OS) |  | 170.26 | 77.6 | 0.03 | *Ligusticum chuanxiong* Hort. |
| MOL002185 | 1、4-Cineole | [C10H18O](https://pubchem.ncbi.nlm.nih.gov/#query=C10H18O) |  | 154.28 | 60.92 | 0.04 | *Ligusticum chuanxiong* Hort. |
| MOL002186 | [Aromadendrene oxide 2](http://5th.tcmspw.com/molecule.php?qn=2186) | [C15H24O](https://pubchem.ncbi.nlm.nih.gov/#query=C15H24O) |  | 220.39 | 65.1 | 0.14 | *Ligusticum chuanxiong* Hort. |
| MOL002192 | Coniferylfcrulate | C20H20O6 |  | 356.4 | 4.54 | 0.39 | *Ligusticum chuanxiong* Hort. |
| MOL003127 | germacrene D | [C15H24](https://pubchem.ncbi.nlm.nih.gov/#query=C15H24) |  | 204.39 | 19.22 | 0.06 | *Ligusticum chuanxiong* Hort. |
| MOL002196 | [Hexaphenone](http://5th.tcmspw.com/molecule.php?qn=2196) | [C12H16O](https://pubchem.ncbi.nlm.nih.gov/#query=C12H16O) |  | 176.28 | 19.88 | 0.04 | *Ligusticum chuanxiong* Hort. |
| MOL002202 | tetramethylpyrazine | [C8H12N2](https://pubchem.ncbi.nlm.nih.gov/#query=C8H12N2) |  | 136.22 | 20.01 | 0.03 | *Ligusticum chuanxiong* Hort. |
| MOL002208 | senkyunolide-A | [C12H16O2](https://pubchem.ncbi.nlm.nih.gov/#query=C12H16O2) |  | 192.28 | 68.28 | 0.07 | *Ligusticum chuanxiong* Hort. |
| MOL002210 | [Senkyunolide G](http://5th.tcmspw.com/molecule.php?qn=2209) | [C12H16O3](https://pubchem.ncbi.nlm.nih.gov/#query=C12H16O3) |  | 208.28 | 39.52 | 0.08 | *Ligusticum chuanxiong* Hort. |
| MOL000223 | [senkyunolide I](https://www.ncbi.nlm.nih.gov/pcsubstance/?term=%22senkyunolide%20I%22%5bCompleteSynonym%5d%20AND%2011521428%5bStandardizedCID%5d) | [C12H16O4](https://pubchem.ncbi.nlm.nih.gov/#query=C12H16O4) |  | 224.28 | 26.78 | 0.1 | *Ligusticum chuanxiong* Hort. |
| MOL000234 | [caffeic acid](http://5th.tcmspw.com/molecule.php?qn=223) | [C9H8O4](https://pubchem.ncbi.nlm.nih.gov/#query=C9H8O4) |  | 180.17 | 25.76 | 0.05 | *Ligusticum chuanxiong* Hort.、 *Rehmanniae radix* preparata、 |
| MOL000359 | Sitosterol | [C29H50O](https://pubchem.ncbi.nlm.nih.gov/#query=C29H50O) |  | 414.79 | 36.91 | 0.75 | *Ligusticum chuanxiong* Hort.、 *Cynanchum otophyllum* Schneid.、 *Rehmanniae radix* preparata、 |
| MOL000433 | Folic acid | [C19H19N7O6](https://pubchem.ncbi.nlm.nih.gov/#query=C19H19N7O6) |  | 441.45 | 68.96 | 0.71 | *Ligusticum chuanxiong* Hort. |
| MOL000675 | 2-Amylfuran | [C9H14O](https://pubchem.ncbi.nlm.nih.gov/#query=C9H14O) |  | 138.23 | 54.59 | 0.02 | *Ligusticum chuanxiong* Hort. |
| MOL000842 | sucrose | [C12H22O11](https://pubchem.ncbi.nlm.nih.gov/#query=C12H22O11) |  | 342.34 | 7.17 | 0.23 | *Ligusticum chuanxiong* Hort.、 *Cynanchum otophyllum* Schneid.、 *Rehmanniae radix* preparata、 |
| MOL000106 | pyrogallol | [C6H6O3](https://pubchem.ncbi.nlm.nih.gov/#query=C6H6O3) |  | 126.12 | 22.98 | 0.02 | *Cynanchum otophyllum Schneid.* |
| MOL001246 | [Nopinone](https://www.ncbi.nlm.nih.gov/pcsubstance/?term=%22(1S)-(-)-Nopinone%22%5bCompleteSynonym%5d%20AND%20157139%5bStandardizedCID%5d) | [C9H14O](https://pubchem.ncbi.nlm.nih.gov/#query=C9H14O) |  | 138.23 | 57.86 | 0.05 | *Cynanchum otophyllum Schneid.* |
| MOL001393 | [myristic acid](http://5th.tcmspw.com/molecule.php?qn=1393) | [C14H28O2](https://pubchem.ncbi.nlm.nih.gov/#query=C14H28O2) |  | 228.42 | 21.18 | 0.07 | *Cynanchum otophyllum Schneid.* |
| MOL001801 | [salicylic acid](http://lsp.nwu.edu.cn/molecule.php?qn=1801) | [C7H6O3](https://pubchem.ncbi.nlm.nih.gov/#query=C7H6O3) |  | 138.13 | 32.13 | 0.03 | *Cynanchum otophyllum Schneid.* |
| MOL001888 | [2、2-dimethylcyclohexanol](http://5th.tcmspw.com/molecule.php?qn=1888) | [C8H16O](https://pubchem.ncbi.nlm.nih.gov/#query=C8H16O) |  | 128.24 | 82.54 | 0.02 | *Cynanchum otophyllum Schneid.* |
| MOL001891 | 9-methylidenefluorene | [C14H10](https://pubchem.ncbi.nlm.nih.gov/#query=C14H10) |  | 178.24 | 26.87 | 0.09 | *Cynanchum otophyllum Schneid.* |
| MOL001892 | [dipropyl phthalate](http://www.baidu.com/link?url=VW18yYt-G7z5C4kQ54JgxS1H12-V3Wbj01fOkrSxibkglRjrq672lrqJV5SP-9kbl_kLPmAVjl-9DDFJ_ufTtN06tgdq1nl4Oz3UARK6pve) | [C14H18O4](https://pubchem.ncbi.nlm.nih.gov/#query=C14H18O4) |  | 250.32 | 66.3 | 0.1 | *Cynanchum otophyllum Schneid.* |
| MOL001895 | [2、6-Di-tert-butylphenol](http://www.baidu.com/link?url=cDm7DFvXo1_OoIrjYsQZAb1dUpYTRXN4FZSlZRclItGfGqU_6Y2I3OHNvcGkXUddPUfyuLi-nWQWKCUIKhWreK) | [C14H22O](https://pubchem.ncbi.nlm.nih.gov/#query=C14H22O) |  | 206.36 | 38.9 | 0.06 | *Cynanchum otophyllum Schneid.* |
| MOL001896 | Darwinol | [C10H16O](https://pubchem.ncbi.nlm.nih.gov/#query=C10H16O) |  | 152.26 | 49.79 | 0.06 | *Cynanchum otophyllum Schneid.* |
| MOL001897 | [(+)-trans-Myrtanol](https://www.ncbi.nlm.nih.gov/pcsubstance/?term=%22(%2B)-trans-Myrtanol%22%5bCompleteSynonym%5d%20AND%2084880%5bStandardizedCID%5d) | [C10H18O](https://pubchem.ncbi.nlm.nih.gov/#query=C10H18O) |  | 154.28 | 49.66 | 0.06 | *Cynanchum otophyllum Schneid.* |
| MOL001900 | 23-Hydroxybetulinic acid | [C30H48O4](https://pubchem.ncbi.nlm.nih.gov/#query=C30H48O4) |  | 472.78 | 16.91 | 0.77 | *Cynanchum otophyllum Schneid.* |
| MOL001901 | 24-Methylene-cycloartanol | [C31H52O](https://pubchem.ncbi.nlm.nih.gov/#query=C31H52O) |  | 440.83 | 10.4 | 0.79 | *Cynanchum otophyllum Schneid.* |
| MOL001904 | Allyl-cresol | [C10H12O](https://pubchem.ncbi.nlm.nih.gov/#query=C10H12O) |  | 148.22 | 52.06 | 0.03 | *Cynanchum otophyllum Schneid.* |
| MOL001906 | Methyl gallate | [C8H8O5](https://pubchem.ncbi.nlm.nih.gov/#query=C8H8O5) |  | 184.16 | 30.91 | 0.05 | *Cynanchum otophyllum Schneid.* |
| MOL001907 | Ethyl gallate | [C9H10O5](https://pubchem.ncbi.nlm.nih.gov/#query=C9H10O5) |  | 198.19 | 25.61 | 0.06 | *Cynanchum otophyllum Schneid.* |
| MOL001915 | [paeonoside](http://5th.tcmspw.com/molecule.php?qn=1915) | [C27H30O16](https://pubchem.ncbi.nlm.nih.gov/#query=C27H30O16) |  | 610.57 | 3.47 | 0.71 | *Cynanchum otophyllum Schneid.* |
| MOL000561 | [Astragalin](http://5th.tcmspw.com/molecule.php?qn=561) | [C21H20O11](https://pubchem.ncbi.nlm.nih.gov/#query=C21H20O11) |  | 448.41 | 14.03 | 0.74 | *Cynanchum otophyllum Schneid.* |
| MOL001917 | [(3S、3aR、5S、6S、7aR)-5、6-dihydroxy-3、6-dimethyl-3、3a、4、5、7、7a-hexahydrobenzofuran-2-one](http://5th.tcmspw.com/molecule.php?qn=1917) | [C10H16O4](https://pubchem.ncbi.nlm.nih.gov/#query=C10H16O4) |  | 200.26 | 96.64 | 0.07 | *Cynanchum otophyllum Schneid.* |
| MOL001918 | Paeoniflorigenone | [C17H18O6](https://pubchem.ncbi.nlm.nih.gov/#query=C17H18O6) |  | 318.35 | 87.59 | 0.37 | *Cynanchum otophyllum Schneid.* |
| MOL001919 | Palbinone | [C22H30O4](https://pubchem.ncbi.nlm.nih.gov/search/#query=C22H30O4) |  | 358.52 | 43.56 | 0.53 | *Cynanchum otophyllum Schneid.* |
| MOL009092 | [1、2、3、4、6-O-Pentagalloyl glucose](http://www.baidu.com/link?url=smPx-CP08QOeq2ibzzZ0H8oZHlLqPkIkKXlB1QohoLgnMv0evrnfJ4_3_WZsAWpqSHvhOcKKozdo7ccYWAm3CfwGGAQkmTFMVu-wFBQ1TXi) | [C41H32O26](https://pubchem.ncbi.nlm.nih.gov/#query=C41H32O26) |  | 940.72 | 3.01 | 0.21 | *Cynanchum otophyllum Schneid.* |
| MOL001921 | Lactiflorin | [C23H26O10](https://pubchem.ncbi.nlm.nih.gov/#query=C23H26O10) |  | 462.49 | 49.12 | 0.8 | *Cynanchum otophyllum Schneid.* |
| MOL001923 | Paeonilactone C | [C17H18O6](https://pubchem.ncbi.nlm.nih.gov/#query=C17H18O6) |  | 318.35 | 17.84 | 0.3 | *Cynanchum otophyllum Schneid.* |
| MOL001924 | [paeoniflorin](http://5th.tcmspw.com/molecule.php?qn=1924) | C23H28O11 |  | 480.51 | 53.87 | 0.79 | *Cynanchum otophyllum Schneid.* |
| MOL001927 | [albiflorin](http://5th.tcmspw.com/molecule.php?qn=1927) | [C23H28O11](https://pubchem.ncbi.nlm.nih.gov/search/#query=C23H28O11) |  | 480.51 | 12.09 | 0.77 | *Cynanchum otophyllum Schneid.* |
| MOL001928 | [albiflorin_qt](http://5th.tcmspw.com/molecule.php?qn=1928) | C18H22O5 |  | 318.35 | 66.64 | 0.33 | *Cynanchum otophyllum Schneid.* |
| MOL001930 | benzoylpaeoniflorin | [C30H32O13](https://pubchem.ncbi.nlm.nih.gov/search/#query=C30H32O13) |  | 584.62 | 31.27 | 0.75 | *Cynanchum otophyllum Schneid.* |
| MOL001932 | [galloylpaeoniflorin](http://5th.tcmspw.com/molecule.php?qn=1932) | [C30H32O15](https://pubchem.ncbi.nlm.nih.gov/#query=C30H32O15) |  | 632.62 | 3.03 | 0.42 | *Cynanchum otophyllum Schneid.* |
| MOL001933 | Oxypaeoniflorin | [C23H28O12](https://pubchem.ncbi.nlm.nih.gov/#query=C23H28O12) |  | 496.51 | 21.88 | 0.78 | *Cynanchum otophyllum Schneid.* |
| MOL001934 | Paeonilactone A | [C10H14O4](https://pubchem.ncbi.nlm.nih.gov/#query=C10H14O4) |  | 198.24 | 104.94 | 0.08 | *Cynanchum otophyllum Schneid.* |
| MOL001935 | Paeonilactone B | [C10H12O4](https://pubchem.ncbi.nlm.nih.gov/#query=C10H12O4) |  | 196.22 | 97.79 | 0.08 | *Cynanchum otophyllum Schneid.* |
| MOL000211 | betulinic acid | [C30H48O3](https://pubchem.ncbi.nlm.nih.gov/#query=C30H48O3) |  | 456.78 | 55.38 | 0.78 | *Cynanchum otophyllum Schneid.* |
| MOL000263 | oleanolic acid | [C30H48O3](https://pubchem.ncbi.nlm.nih.gov/#query=C30H48O3) |  | 456.78 | 29.02 | 0.76 | *Cynanchum otophyllum Schneid.* |
| MOL000422 | kaempferol | [C15H10O6](https://pubchem.ncbi.nlm.nih.gov/#query=C15H10O6) |  | 286.25 | 41.88 | 0.24 | *Cynanchum otophyllum Schneid.* |
| MOL000492 | (+)-catechin | [C15H14O6](https://pubchem.ncbi.nlm.nih.gov/#query=C15H14O6) |  | 290.29 | 54.83 | 0.24 | *Cynanchum otophyllum Schneid.* |
| MOL000513 | Gallic acid | [C7H6O5](https://pubchem.ncbi.nlm.nih.gov/#query=C7H6O5) |  | 170.13 | 31.69 | 0.04 | *Cynanchum otophyllum Schneid.* |
| MOL000551 | [Hederagenol](http://5th.tcmspw.com/molecule.php?qn=551) | [C30H48O4](https://pubchem.ncbi.nlm.nih.gov/#query=C30H48O4) |  | 472.78 | 22.42 | 0.74 | *Cynanchum otophyllum Schneid.* |
| MOL000676 | Dibutyl phthalate | [C16H22O4](https://pubchem.ncbi.nlm.nih.gov/#query=C16H22O4) |  | 278.38 | 64.54 | 0.13 | *Cynanchum otophyllum Schneid.* |
| MOL001436 | [leonuride](http://lsp.nwu.edu.cn/molecule.php?qn=1436) | [C15H24O9](https://pubchem.ncbi.nlm.nih.gov/#query=C15H24O9) |  | 348.39 | 2.6 | 0.33 | *Rehmanniae radix* preparata、 |
| MOL003333 | [acteoside](http://lsp.nwu.edu.cn/molecule.php?qn=3333) | [C29H36O15](https://pubchem.ncbi.nlm.nih.gov/#query=C29H36O15) |  | 624.65 | 2.94 | 0.62 | *Rehmanniae radix* preparata、 |
| MOL001768 | 5-Hydroxymethyl-2-furancarboxylic acid | [C6H6O4](https://pubchem.ncbi.nlm.nih.gov/#query=C6H6O4) |  | 142.12 | 52.44 | 0.03 | *Rehmanniae radix* preparata、 |
| MOL001772 | Dihydro-beta-ionone | [C13H22O](https://pubchem.ncbi.nlm.nih.gov/#query=C13H22O) |  | 194.35 | 26.25 | 0.05 | *Rehmanniae radix* preparata、 |
| MOL002321 | L-Pyroglutamic acid | [C5H7NO3](https://pubchem.ncbi.nlm.nih.gov/#query=C5H7NO3) |  | 129.13 | 96.25 | 0.02 | *Rehmanniae radix* preparata、 |
| MOL002819 | Catalpol | [C15H22O10](https://pubchem.ncbi.nlm.nih.gov/#query=C15H22O10) |  | 362.37 | 5.07 | 0.44 | *Rehmanniae radix* preparata、 |
| MOL002820 | [catapol_qt](http://lsp.nwu.edu.cn/molecule.php?qn=2820) | C9H1406 |  | 200.21 | 44.69 | 0.1 | *Rehmanniae radix* preparata、 |
| MOL003202 | [8-epi-Loganic acid](http://lsp.nwu.edu.cn/molecule.php?qn=3202) | [C16H24O10](https://pubchem.ncbi.nlm.nih.gov/#query=C16H24O10) |  | 376.4 | 4.43 | 0.4 | *Rehmanniae radix* preparata、 |
| MOL003331 | Forsythoside A | [C29H36O15](https://pubchem.ncbi.nlm.nih.gov/#query=C29H36O15) |  | 624.65 | 3.05 | 0.61 | *Rehmanniae radix* preparata、 |
| MOL003696 | [Cistanoside F](http://lsp.nwu.edu.cn/molecule.php?qn=3696) | [C21H28O13](https://pubchem.ncbi.nlm.nih.gov/#query=C21H28O13) |  | 488.49 | 4.74 | 0.69 | *Rehmanniae radix* preparata、 |
| MOL003698 | [(2S、3R、4R、5S、6R)-2-[[(1S、4aS、5R、7aR)-4a、5-dihydroxy-7-methylol-5、7a-dihydro-1H-cyclopenta[c]pyran-1-yl]oxy]-6-methylol-tetrahydropyran-3、4、5-triol](http://lsp.nwu.edu.cn/molecule.php?qn=3698) | [C15H22O10](https://pubchem.ncbi.nlm.nih.gov/#query=C15H22O10) |  | 362.37 | 3.1 | 0.37 | *Rehmanniae radix* preparata、 |
| MOL003700 | Dihydrocatalpol | [C15H24O10](https://pubchem.ncbi.nlm.nih.gov/#query=C15H24O10) |  | 364.39 | 3.58 | 0.44 | *Rehmanniae radix* preparata、 |
| MOL003701 | geniposide | [C17H24O10](https://pubchem.ncbi.nlm.nih.gov/#query=C17H24O10) |  | 388.41 | 3.78 | 0.44 | *Rehmanniae radix* preparata、 |
| MOL003702 | [geniposide_qt](http://lsp.nwu.edu.cn/molecule.php?qn=3702) | [C11H14O5](https://pubchem.ncbi.nlm.nih.gov/#query=C17H24O10) |  | 226.25 | 39.71 | 0.1 | *Rehmanniae radix* preparata、 |
| MOL003703 | [glutinoside](http://lsp.nwu.edu.cn/molecule.php?qn=3703) | [C15H23ClO10](https://pubchem.ncbi.nlm.nih.gov/#query=C15H23ClO10) |  | 398.83 | 21.33 | 0.52 | *Rehmanniae radix* preparata、 |
| MOL003704 | [Jiofuran](http://lsp.nwu.edu.cn/molecule.php?qn=3704) | [C9H12O4](https://pubchem.ncbi.nlm.nih.gov/#query=C9H12O4) |  | 184.21 | 54.91 | 0.06 | *Rehmanniae radix* preparata、 |
| MOL003705 | [jioglutin A](http://lsp.nwu.edu.cn/molecule.php?qn=3705) | [C10H15ClO5](https://pubchem.ncbi.nlm.nih.gov/#query=C10H15ClO5) |  | 250.7 | 90.7 | 0.13 | *Rehmanniae radix* preparata、 |
| MOL003707 | [jioglutin C](http://lsp.nwu.edu.cn/molecule.php?qn=3707) | [C10H16O6](https://pubchem.ncbi.nlm.nih.gov/#query=C10H16O6) |  | 232.26 | 2.55 | 0.13 | *Rehmanniae radix* preparata、 |
| MOL003708 | [jioglutin D](http://lsp.nwu.edu.cn/molecule.php?qn=3708) | [C11H18O6](https://pubchem.ncbi.nlm.nih.gov/#query=C11H18O6) |  | 246.29 | 39.02 | 0.14 | *Rehmanniae radix* preparata、 |
| MOL003710 | jioglutolide | [C9H14O4](https://pubchem.ncbi.nlm.nih.gov/search/#query=C9H14O4) |  | 186.23 | 86.95 | 0.06 | *Rehmanniae radix* preparata、 |
| MOL003712 | Methyl (1S,4aS,7aS)-7-methylidene-1-[(2S,3R,4S,5S,6R)-3,4,5-trihydroxy-6-[[(2R,3R,4R,5S,6R)-3,4,5-trihydroxy-6-methyloxan-2-yl]oxymethyl]oxan-2-yl]oxy-4a,5,6,7a-tetrahydro-1H-cyclopenta[c]pyran-4-carboxylate  Cite | [C23H34O13](https://pubchem.ncbi.nlm.nih.gov/#query=C23H34O13) |  | 518.57 | 28.27 | 0.84 | *Rehmanniae radix* preparata、 |
| MOL003714 | [Jionoside A](http://lsp.nwu.edu.cn/molecule.php?qn=3714) | [C36H48O20](https://pubchem.ncbi.nlm.nih.gov/search/#query=C36H48O20) |  | 800.84 | 3.62 | 0.36 | *Rehmanniae radix* preparata、 |
| MOL003715 | Jionoside B | [C37H50O20](https://pubchem.ncbi.nlm.nih.gov/search/#query=C37H50O20) |  | 814.87 | 4.27 | 0.35 | *Rehmanniae radix* preparata、 |
| MOL003716 | [Melittoside](http://lsp.nwu.edu.cn/molecule.php?qn=3716) | [C21H32O15](https://pubchem.ncbi.nlm.nih.gov/#query=C21H32O15) |  | 524.53 | 19.2 | 0.8 | *Rehmanniae radix* preparata、 |
| MOL003720 | Purpureaside C | [C35H46O20](https://pubchem.ncbi.nlm.nih.gov/search/#query=C35H46O20) |  | 786.81 | 3.14 | 0.38 | *Rehmanniae radix* preparata、 |
| MOL003726 | [rehmannioside B](http://lsp.nwu.edu.cn/molecule.php?qn=3726) | [C21H32O15](https://pubchem.ncbi.nlm.nih.gov/#query=C21H32O15) |  | 524.53 | 2.05 | 0.88 | *Rehmanniae radix* preparata、 |
| MOL003727 | [rehmannioside C](http://lsp.nwu.edu.cn/molecule.php?qn=3727) | [C21H34O14](https://pubchem.ncbi.nlm.nih.gov/search/#query=C21H34O14) |  | 510.55 | 10.23 | 0.86 | *Rehmanniae radix* preparata、 |
| MOL003728 | [6-O-p-hydroxybenzoylajugol](http://lsp.nwu.edu.cn/molecule.php?qn=3728) | [C22H28O11](https://pubchem.ncbi.nlm.nih.gov/#query=C22H28O11) |  | 468.5 | 4.53 | 0.81 | *Rehmanniae radix* preparata、 |
| MOL003729 | Rehmapicroside | [C16H26O8](https://pubchem.ncbi.nlm.nih.gov/#query=C16H26O8) |  | 346.42 | 13.59 | 0.26 | *Rehmanniae radix* preparata、 |
| MOL003730 | Rehmannioside A | [C21H32O15](https://pubchem.ncbi.nlm.nih.gov/#query=C21H32O15) |  | 524.53 | 25.95 | 0.87 | *Rehmanniae radix* preparata、 |
| MOL003731 | [Rehmaglutin A](http://lsp.nwu.edu.cn/molecule.php?qn=3731) | [C9H14O5](https://pubchem.ncbi.nlm.nih.gov/#query=C9H14O5) |  | 202.23 | 29.7 | 0.1 | *Rehmanniae radix* preparata、 |
| MOL003732 | [Rehmaglutin D](http://lsp.nwu.edu.cn/molecule.php?qn=3732) | C9H13ClO4 |  | 220.67 | 57.03 | 0.1 | *Rehmanniae radix* preparata、 |
| MOL003733 | 6-O-Vanilloylajugol | [C23H30O12](https://pubchem.ncbi.nlm.nih.gov/#query=C23H30O12) |  | 484.5 | 23.44 | 0.84 | *Rehmanniae radix* preparata、 |
| MOL003735 | aucubin | [C15H22O9](https://pubchem.ncbi.nlm.nih.gov/#query=C9H8O4) |  | 346.37 | 4.17 | 0.33 | *Rehmanniae radix* preparata、 |
| MOL000732 | Stachyose | [C24H42O21](https://pubchem.ncbi.nlm.nih.gov/#query=C24H42O21) |  | 666.66 | 3.25 | 0.59 | *Rehmanniae radix* preparata、 |
| MOL000841 | Raffinose | [C18H32O16](https://pubchem.ncbi.nlm.nih.gov/#query=C18H32O16) |  | 504.5 | 11.79 | 0.66 | *Rehmanniae radix* preparata、 |

**Table S2 Expression Analysis of DifferentiallyEndogenous Metabolites in Control, Model and Siwu Paste a,b**

1. **Positive-ion mod**

| Rt (min) | m/z | Metabolites | Compound ID | Formula | Model vs. Control | | | SWP vs. Model | | |
| --- | --- | --- | --- | --- | --- | --- | --- | --- | --- | --- |
| VIP | FC | Trend | VIP | FC | Trend |
| 0.0425 | 212.0915 | 6-Maleimidocaproic acid | 24061 | C10H13NO4 | 1.4849 | 1.7660 | ↑** | 1.6684 | 1.1375 | ↑# |
| 0.0425 | 145.0495 | (E)-2-Methylglutaconic acid | 6584 | C6H8O4 | 1.4719 | 1.8577 | ↑** | 1.6422 | 1.1741 | ↑# |
| 0.2116 | 180.0654 | Adrenochrome | 64954 | C9H9NO3 | - | - | - | 2.6121 | 1.5549 | ↑## |
| 0.7552 | 309.1653 | 1-[(5-Amino-5-carboxypentyl)amino]-1-deoxyfructose | HMDB0034879 | C12H24N2O7 | 1.4531 | 2.3320 | ↑** | 1.8528 | 2.7975 | ↑# |
| 0.7552 | 147.1127 | L-Lysine | 25 | C6H14N2O2 | 1.5336 | 3.2216 | ↑** | - | - | - |
| 0.7552 | 130.0863 | D-Pipecolic acid | 58337 | C6H11NO2 | 1.5323 | 3.1295 | ↑** | - | - | - |
| 0.7552 | 295.1497 | N-(1-Deoxy-1-fructosyl)proline | HMDB0038493 | C11H19NO7 | 1.3905 | 2.3791 | ↑** | - | - | - |
| 0.7552 | 133.0972 | L-Ornithine | 45121 | C5H12N2O2 | 1.4415 | 2.9046 | ↑** | - | - | - |
| 0.7758 | 156.0767 | L-Histidine | 21 | C6H9N3O2 | 1.4578 | 2.2294 | ↑** | - | - | - |
| 0.7758 | 110.0716 | 4-Pyrimidine Methanamine (hydrochloride) | 45035 | C5H7N3 | 1.4416 | 2.2639 | ↑** | - | - | - |
| 0.7961 | 427.1511 | Inophyllolide chromanol | LMPK12100024 | C25H24O5 | 1.4400 | 15.3587 | ↑** | - | - | - |
| 0.8171 | 280.0918 | Glycerophosphocholine | HMDB0000086 | C8H20NO6P | - | - | - | 1.8647 | 0.5757 | ↓# |
| 0.8171 | 175.1189 | L-Arginine | 13 | C6H14N4O2 | 1.2323 | 0.1531 | ↓** | - | - | - |
| 0.8171 | 152.0681 | Vigabatrin | HMDB0015212 | C6H11NO2 | 1.3983 | 2.0321 | ↑** | - | - | - |
| 0.8357 | 308.1552 | Argininosuccinic acid | HMDB0000052 | C10H18N4O6 | 1.3889 | 7.4291 | ↑** | - | - | - |
| 0.8715 | 104.1073 | Choline | 56 | C5H13NO | - | - | - | 2.1937 | 0.7438 | ↓## |
| 0.8893 | 283.1626 | Carisoprodol | HMDB0014539 | C12H24N2O4 | 1.4171 | 0.0927 | ↓** | - | - | - |
| 0.9075 | 367.1584 | Prolylglycine | HMDB0011178 | C7H12N2O3 | - | - | - | 1.9324 | 1.7284 | ↑## |
| 0.9075 | 287.2438 | N1,N12-Diacetylspermine | 6525 | C14H30N4O2 | 1.3470 | 174456  036.2939 | ↑** | 1.5473 | 0.4615 | ↓# |
| 0.9075 | 266.0745 | Cytidine | HMDB0000089 | C9H13N3O5 | - | - | - | 1.8011 | 0.6955 | ↓# |
| 0.9253 | 132.0768 | Creatine | 7 | C4H9N3O2 | 1.3355 | 1.7279 | ↑** | 2.0185 | 0.7669 | ↓## |
| 0.9253 | 101.1077 | (+)-2,3-Dihydro-3-methyl-1H-pyrrole | HMDB0033529 | C5H9N | 1.1076 | 5.7964 | ↑** | - | - | - |
| 0.9439 | 170.0923 | 3-Methyl-L-histidine | 3293 | C7H11N3O2 | 1.0093 | 1.4765 | ↑* | 2.2071 | 0.5455 | ↓## |
| 0.9439 | 116.0708 | D-Proline | 58150 | C5H9NO2 | 1.4543 | 3.2179 | ↑** | - | - | - |
| 0.9439 | 162.1124 | L-Carnitine | 34532 | C7H15NO3 | 1.2235 | 1.3412 | ↑** | - | - | - |
| 0.9439 | 198.0848 | Citrulline | HMDB0000904 | C6H13N3O3 | 1.3376 | 1.5219 | ↑** | - | - | - |
| 0.9610 | 234.0969 | Muramic acid | HMDB0003254 | C9H17NO7 | 1.2648 | 18.7832 | ↑** | 1.5402 | 6.9957 | ↑# |
| 1.1508 | 169.0355 | Uric acid | 88 | C5H4N4O3 | - | - | - | 2.4229 | 0.5268 | ↓## |
| 1.1508 | 118.0864 | N-Methyl-a-aminoisobutyric acid | 6508 | C5H11NO2 | 1.3942 | 1.8031 | ↑** | - | - | - |
| 1.1508 | 130.0863 | 2-amino-6-hydroxyhexanoic acid | HMDB0142963 | C6H13NO3 | 1.2578 | 1.5188 | ↑** | - | - | - |
| 1.1508 | 219.0973 | 5-L-Glutamyl-L-alanine | 58376 | C8H14N2O5 | 1.1943 | 6.1616 | ↑** | - | - | - |
| 1.1692 | 150.0582 | THTC | 68817 | C5H8O2S | - | - | - | 1.5609 | 0.8508 | ↓# |
| 1.1692 | 123.0554 | Niacinamide | 1497 | C6H6N2O | - | - | - | 2.1524 | 0.7616 | ↓## |
| 1.1692 | 280.1387 | N-(1-Deoxy-1-fructosyl)valine | HMDB0037844 | C11H21NO7 | 1.3788 | 2.0038 | ↑** | 1.7638 | 3.6198 | ↑# |
| 1.1692 | 388.0973 | Cephaloglycin | HMDB0014827 | C18H19N3O6S | - | - | - | 1.7906 | 8.2884 | ↑# |
| 1.1692 | 280.0902 | 5-Methylcytidine | 5919 | C10H15N3O5 | 1.3423 | 1.9297 | ↑** | 1.6317 | 0.7950 | ↓# |
| 1.1692 | 104.0532 | (±)-2-Methylthiazolidine | HMDB0031682 | C4H9NS | - | - | - | 1.5918 | 0.8479 | ↓# |
| 1.1692 | 344.1335 | N-(1-Deoxy-1-fructosyl)tyrosine | HMDB0037845 | C15H21NO8 | 1.5584 | 24.6366 | ↑** | - | - | - |
| 1.1692 | 312.1105 | N-(1-Deoxy-1-fructosyl)methionine | HMDB0037841 | C11H21NO7S | 1.3986 | 3.4403 | ↑** | - | - | - |
| 1.1692 | 204.1229 | Acetylcarnitine | 956 | C9H17NO4 | 1.4386 | 2.0874 | ↑** | - | - | - |
| 1.1871 | 136.0757 | 2-Phenylacetamide | 3260 | C8H9NO | 1.5755 | ####### | ↑** | - | - | - |
| 1.1871 | 182.0811 | 2-Hydroxycinnamic acid | 306 | C9H8O3 | 1.5744 | ####### | ↑** | - | - | - |
| 1.1871 | 119.0493 | Benzylformate | 66324 | C8H8O2 | 1.5752 | 9.3516 | ↑** | - | - | - |
| 1.1871 | 123.0442 | Salicylaldehyde | 66352 | C7H6O2 | 1.5755 | ####### | ↑** | - | - | - |
| 1.1871 | 204.0630 | 4-Hydroxy-4-(3-pyridyl)-butanoic acid | HMDB0001119 | C9H11NO3 | 1.5671 | ####### | ↑** | - | - | - |
| 1.2241 | 241.1544 | Cerulenin | HMDB0015168 | C12H17NO3 | 1.2119 | 1.7294 | ↑** | 2.0170 | 0.6247 | ↓## |
| 1.2241 | 314.1229 | Tyramine glucuronide | HMDB0010328 | C14H19NO7 | 1.3700 | ####### | ↑** | - | - | - |
| 1.2447 | 233.1129 | N2-Succinyl-L-ornithine | 63478 | C9H16N2O5 | 1.0674 | 2.8817 | ↑** | - | - | - |
| 1.2834 | 153.0658 | N-Methyl-2-pyridone-5-carboxamide (Nudifloramide) | 1501 | C7H8N2O2 | 1.2321 | 0.4951 | ↓** | - | - | - |
| 1.3598 | 307.0645 | Xanthosine | 3408 | C10H12N4O6 | 1.1276 | 0.0780 | ↓** | - | - | - |
| 1.3785 | 338.1181 | Neosaxitoxin | HMDB0029369 | C10H17N7O5 | 1.2355 | 1.5833 | ↑** | 1.8851 | 2.9920 | ↑# |
| 1.3785 | 294.1544 | N-(1-Deoxy-1-fructosyl)leucine | HMDB0037840 | C12H23NO7 | 1.3688 | 1.6813 | ↑** | 1.7581 | 2.9366 | ↑# |
| 1.3980 | 132.1019 | L-Isoleucine | 23 | C6H13NO2 | 1.4894 | 1.8530 | ↑** | - | - | - |
| 1.4522 | 218.1385 | (±)-Propionylcarnitine | 85176 | C10H19NO4 | 1.5238 | 6.2917 | ↑** | - | - | - |
| 1.4720 | 160.0756 | Indoleacetaldehyde | 6068 | C10H9NO | 1.4544 | 2.6762 | ↑** | 2.2510 | 0.6018 | ↓## |
| 1.4720 | 339.1546 | Niazirinin | HMDB0032808 | C16H19NO6 | 1.3329 | 2.4275 | ↑** | - | - | - |
| 1.5304 | 262.1647 | 3-hydroxyisovalerylcarnitine | LMFA07070041 | C12H23NO5 | 1.3465 | 1.7976 | ↑** | - | - | - |
| 1.5304 | 246.1334 | Depdecin | LMFA05000013 | C11H16O5 | 1.3699 | 2.1561 | ↑** | - | - | - |
| 1.6738 | 227.1390 | Isoleucyl-Hydroxyproline | HMDB0028908 | C11H20N2O4 | - | - | - | 2.0182 | 0.4710 | ↓## |
| 1.8015 | 250.0931 | Zidovudine | HMDB0014638 | C10H13N5O4 | 1.1465 | 2.6299 | ↑** | 1.9673 | 1.8542 | ↑## |
| 1.8234 | 99.0445 | 2-Furanmethanol | 85262 | C5H6O2 | 1.4502 | 1.5639 | ↑** | - | - | - |
| 1.8844 | 216.1229 | 2-amino-8-oxo-9,10-epoxy-decanoic acid | LMFA01060176 | C10H17NO4 | 1.4878 | 2.4416 | ↑** | 2.1007 | 1.3694 | ↑## |
| 1.9065 | 247.1286 | gamma-Glutamylvaline | HMDB0011172 | C10H18N2O5 | 1.5027 | 2.4580 | ↑** | - | - | - |
| 1.9502 | 139.0389 | m-Salicylic acid | 3262 | C7H6O3 | 1.2911 | 1.3778 | ↑** | 1.6968 | 0.8311 | ↓# |
| 1.9502 | 209.0919 | 5-Hydroxyindoleacetic acid | 2975 | C10H9NO3 | 1.1156 | 1.5968 | ↑** | - | - | - |
| 1.9713 | 295.0955 | gamma-L-Glutamyl-L-methionine sulfoxide | HMDB0038613 | C10H18N2O6S | - | - | - | 1.6356 | 2.3814 | ↑# |
| 2.0534 | 166.0862 | Dihydrocoumarin | 65745 | C9H8O2 | 1.5438 | 3.1223 | ↑** | - | - | - |
| 2.0534 | 311.1234 | gamma-Glutamyltyrosine | HMDB0011741 | C14H18N2O6 | 1.4439 | ####### | ↑** | - | - | - |
| 2.0534 | 93.0703 | Toluene | HMDB0034168 | C7H8 | 1.3821 | 1.6885 | ↑** | - | - | - |
| 2.0534 | 188.0680 | 3-Pyridinebutanoic acid | HMDB0001007 | C9H11NO2 | 1.4905 | 2.5883 | ↑** | - | - | - |
| 2.0717 | 107.0494 | Benzaldehyde | 58358 | C7H6O | 1.5560 | 3.3503 | ↑** | - | - | - |
| 2.0717 | 118.0654 | Benzeneacetonitrile | HMDB0034171 | C8H7N | 1.5487 | 2.6471 | ↑** | - | - | - |
| 2.0903 | 350.1206 | N-(1-Deoxy-1-fructosyl)phenylalanine | HMDB0037846 | C15H21NO7 | 1.4446 | 6.6811 | ↑** | 1.6541 | 2.6007 | ↑# |
| 2.3271 | 227.1023 | 1-Pyrroline-5-carboxylic acid | HMDB0001301 | C5H7NO2 | 1.2629 | 2.2032 | ↑** | 2.1512 | 0.5186 | ↓## |
| 2.3702 | 298.1282 | Phenethylamine glucuronide | 61646 | C14H19NO6 | 1.3677 | 4.4967 | ↑** | - | - | - |
| 2.3702 | 384.1145 | Succinyladenosine | HMDB0000912 | C14H17N5O8 | 1.3988 | 2.3771 | ↑** | - | - | - |
| 2.4738 | 212.1490 | Tetraethylene glycol | HMDB0094708 | C8H18O5 | 1.2705 | 0.5324 | ↓** | - | - | - |
| 2.4936 | 220.1177 | Pantothenic Acid | 241 | C9H17NO5 | - | - | - | 1.7665 | 0.7255 | ↓# |
| 2.5747 | 101.0601 | 3-Methylbutyrolactone | 6521 | C5H8O2 | - | - | - | 2.0338 | 0.7233 | ↓## |
| 2.7173 | 231.0762 | Hydroxynalidixic acid | HMDB0060826 | C12H12N2O4 | 1.1381 | 2.3533 | ↑** | - | - | - |
| 2.8864 | 232.1542 | Butyryl-L-carnitine | 964 | C11H21NO4 | 1.5170 | 3.4891 | ↑** | - | - | - |
| 2.9056 | 106.0655 | 2-Propionylpyrrole | HMDB0032492 | C7H9NO | 1.2035 | 0.0700 | ↓** | - | - | - |
| 2.9900 | 221.1535 | (9R,13R)-1a,1b-dihomo-jasmonic acid | LMFA02010010 | C14H22O3 | 1.0032 | 1.2250 | ↑* | - | - | - |
| 3.0120 | 216.0865 | Succinylproline | 69170 | C9H13NO5 | 1.2376 | 2.8436 | ↑** | - | - | - |
| 3.0330 | 126.0915 | 2-Methyl-5-propyloxazole | 92666 | C7H11NO | 1.3139 | 1.8749 | ↑** | - | - | - |
| 3.1584 | 291.1048 | 2,3-Dihydroxyvaleric acid | HMDB0000421 | C5H10O4 | 1.2985 | 0.4866 | ↓** | - | - | - |
| 3.1789 | 345.1441 | Tyrosyl-Tyrosine | HMDB0029117 | C18H20N2O5 | 1.2978 | ####### | ↑** | - | - | - |
| 3.2657 | 211.1441 | Isoleucylproline | HMDB0011174 | C11H20N2O3 | - | - | - | 1.8197 | 0.6639 | ↓# |
| 3.2657 | 100.0761 | 1-Pyrrolidinecarboxaldehyde | 90050 | C5H9NO | - | - | - | 1.6524 | 1.5616 | ↑# |
| 3.2657 | 355.1495 | 1H-Indol-3-ylacetyl-myo-inositol | HMDB0031182 | C16H19NO7 | - | - | - | 1.6707 | 2.3178 | ↑# |
| 3.2657 | 227.1751 | 1,8-Diazacyclotetradecane-2,9-dione | 66151 | C12H22N2O2 | - | - | - | 1.7402 | 0.6049 | ↓# |
| 3.2865 | 367.1496 | 1-(1,2,3,4,5-Pentahydroxypent-1-yl)-1,2,3,4-  tetrahydro-beta-carboline-3-carboxylate | HMDB0012492 | C17H22N2O7 | 1.5246 | 3.4327 | ↑** | 1.5492 | 1.9545 | ↑# |
| 3.3077 | 231.0763 | p-Hydroxyphenobarbital | HMDB0060537 | C12H12N2O4 | - | - | - | 1.8467 | 0.2967 | ↓# |
| 3.3077 | 321.1440 | Formylfusarochromanone | HMDB0038970 | C16H20N2O5 | 1.5321 | 3.4826 | ↑** | 1.5368 | 2.0750 | ↑# |
| 3.3077 | 157.0759 | 3-Indoleacetonitrile | HMDB0006524 | C10H8N2 | 1.3666 | 2.8837 | ↑** | 1.5323 | 0.7045 | ↓# |
| 3.3077 | 164.0704 | 5-Hydroxy-3,4-dihydrocarbostyryl | 1550 | C9H9NO2 | 1.3132 | 3.6451 | ↑** | - | - | - |
| 3.3077 | 210.0757 | 7-hydroxy-6-(hydroxymethyl)-2H-chromen-2-one | HMDB0136775 | C10H8O4 | 1.1919 | 4.2454 | ↑** | - | - | - |
| 3.3277 | 323.1597 | Zanthodioline | HMDB0031929 | C16H19NO5 | 1.4542 | 6.3809 | ↑** | - | - | - |
| 3.3463 | 205.0970 | D-Tryptophan | 65364 | C11H12N2O2 | 1.5195 | 2.6784 | ↑** | 1.5646 | 0.8766 | ↓# |
| 3.3463 | 118.0653 | Indole | 286 | C8H7N | 1.3882 | 1.5920 | ↑** | - | - | - |
| 3.3463 | 221.0919 | 5-Hydroxy-L-tryptophan | 364 | C11H12N2O3 | 1.4530 | 2.1865 | ↑** | - | - | - |
| 3.3463 | 159.0916 | Nicotyrine | 68165 | C10H10N2 | 1.5236 | 2.7103 | ↑** | - | - | - |
| 3.3463 | 144.0807 | 1-Naphthylamine | 70324 | C10H9N | 1.5198 | 2.8079 | ↑** | - | - | - |
| 3.3463 | 146.0600 | 3-Methyleneoxindole | 65836 | C9H7NO | 1.5162 | 2.5593 | ↑** | - | - | - |
| 3.3463 | 188.0705 | Indoleacrylic acid | HMDB0000734 | C11H9NO2 | 1.5259 | 2.7124 | ↑** | - | - | - |
| 3.3834 | 298.0965 | 5′-Deoxy-5′-<WBR>(methylthio)adenosine | 3425 | C11H15N5O3S | - | - | - | 1.7480 | 1.5596 | ↑# |
| 3.3834 | 245.0918 | Indolylacryloylglycine | HMDB0006005 | C13H12N2O3 | 1.2800 | ####### | ↑** | - | - | - |
| 3.5199 | 179.0702 | 3-(4-Methylphenyl)oxiranecarboxylic acid | 87271 | C10H10O3 | - | - | - | 1.7081 | 0.7129 | ↓# |
| 3.5400 | 158.1174 | Homostachydrine | 66883 | C8H15NO2 | - | - | - | 1.7028 | 3.6679 | ↑# |
| 3.5824 | 190.0497 | 4-(2-Aminophenyl)-2,4-dioxobutanoic acid | HMDB0000978 | C10H9NO4 | 1.2320 | 2.1650 | ↑** | - | - | - |
| 3.5824 | 433.2290 | Prolyl-Threonine | HMDB0029027 | C9H16N2O4 | 1.3668 | 0.1633 | ↓** | - | - | - |
| 3.5824 | 442.2644 | Leukotriene E3 | HMDB0002355 | C23H39NO5S | 1.0913 | ####### | ↑** | - | - | - |
| 3.5824 | 114.0916 | Aminocaproic acid | HMDB0001901 | C6H13NO2 | 1.2744 | 1.4185 | ↑** | - | - | - |
| 3.6434 | 187.0865 | L-Tryptophan | HMDB0000929 | C11H12N2O2 | 1.0549 | 1.9986 | ↑** | - | - | - |
| 3.6619 | 283.1749 | Hexaethylene glycol | HMDB0061822 | C12H26O7 | 1.0633 | 0.8211 | ↓** | 1.7778 | 0.9128 | ↓# |
| 3.6619 | 150.0315 | 5-Imino-2-methyl-1-cyclopenten-1-ol | HMDB0039584 | C6H9NO | 1.4080 | 2.6734 | ↑** | 1.6703 | 0.7318 | ↓# |
| 3.6843 | 254.1020 | Austdiol | HMDB0030858 | C12H12O5 | 1.4456 | ####### | ↑** | - | - | - |
| 3.7255 | 295.1287 | Tyrosyl-Hydroxyproline | HMDB0029106 | C14H18N2O5 | 1.5170 | 5.0142 | ↑** | - | - | - |
| 3.7255 | 117.1024 | 5-Aminopentanamide | HMDB0012176 | C5H12N2O | 1.4339 | 6.2242 | ↑** | - | - | - |
| 3.7255 | 457.1808 | Decitabine | HMDB0015391 | C8H12N4O4 | 1.2753 | ####### | ↑** | - | - | - |
| 3.7689 | 195.0876 | Caffeine | 1455 | C8H10N4O2 | - | - | - | 1.6379 | 0.7759 | ↓# |
| 3.7689 | 374.2021 | 2-O-Methyl-L-fucose | HMDB0033789 | C7H14O5 | 1.3828 | 0.3159 | ↓** | - | - | - |
| 3.8100 | 323.1233 | Ascorbigen | HMDB0029839 | C15H15NO6 | 1.0526 | ####### | ↑** | - | - | - |
| 3.8306 | 217.0970 | 5-Methoxytryptophan | HMDB0002339 | C12H14N2O3 | - | - | - | 1.5573 | 1.7527 | ↑# |
| 3.8306 | 344.2276 | Heptaethylene glycol | HMDB0061835 | C14H30O8 | 1.0441 | 0.8164 | ↓* | - | - | - |
| 3.8720 | 190.1072 | (2S)-2-{[1-(R)-Carboxyethyl]amino}pentanoate | 66366 | C8H15NO4 | 1.5340 | 5.1515 | ↑** | 1.7508 | 0.7332 | ↓# |
| 3.8720 | 246.1698 | 2-Methylbutyroylcarnitine | 5367 | C12H23NO4 | 1.4794 | 3.1149 | ↑** | - | - | - |
| 3.8720 | 185.1283 | Alanyl-Isoleucine | HMDB0028690 | C9H18N2O3 | 1.2738 | ####### | ↑** | - | - | - |
| 3.9152 | 377.1445 | Tetrahydro-2,5-furan-diacetic acid | HMDB0059767 | C8H12O5 | 1.4824 | 2.8627 | ↑** | 1.5390 | 0.7762 | ↓# |
| 3.9152 | 334.1394 | Glutamyltryptophan | HMDB0028830 | C16H19N3O5 | 1.5025 | 4.1228 | ↑** | 1.7929 | 0.6761 | ↓# |
| 3.9152 | 270.0890 | Carajuron | LMPK12010442 | C16H15O5+ | 1.0475 | 0.1991 | ↓** | 1.9808 | 0.4360 | ↓## |
| 3.9559 | 297.1230 | Graveoline | HMDB0033480 | C17H13NO3 | 1.5671 | ####### | ↑** | 1.5902 | 0.8475 | ↓# |
| 3.9559 | 269.0951 | Phenylalanyl-Cysteine | 85894 | C12H16N2O3S | 1.0228 | 6.3512 | ↑* | - | - | - |
| 3.9989 | 268.1176 | Samin | HMDB0038926 | C13H14O5 | 1.3991 | ####### | ↑** | - | - | - |
| 3.9989 | 492.3010 | 3alpha,7alpha,12alpha-trihydroxy-5alpha-  cholan-24-yl sulfate | LMST05020018 | C24H42O7S | 1.2388 | 0.4796 | ↓** | - | - | - |
| 4.0190 | 302.1496 | Tryptophyl-Proline | HMDB0029091 | C16H19N3O3 | 1.3941 | 5.6514 | ↑** | - | - | - |
| 4.0190 | 485.3065 | Gamma-Aminobutyryl-lysine | HMDB0001959 | C10H21N3O3 | 1.1876 | 0.6616 | ↓** | - | - | - |
| 4.0401 | 487.2449 | (ent-2b,4S,9a)-2,4,9-Trihydroxy-10(14)-oplopen  -3-one 2-(2-methylbutanoate) 9-(3-methyl-2E-pentenoate) | HMDB0040993 | C26H40O6 | 1.0639 | 0.5252 | ↓** | 1.7219 | 3.1060 | ↑# |
| 4.0401 | 347.1233 | Miraxanthin-V | 64471 | C17H18N2O6 | 1.0641 | 2.2447 | ↑** | - | - | - |
| 4.0621 | 374.2201 | Xanthoplanine | HMDB0033356 | C21H26NO4+ | 1.1075 | 0.5023 | ↓** | - | - | - |
| 4.0813 | 275.1022 | (2S,4S)-Monatin | HMDB0041309 | C14H16N2O5 | 1.5215 | ####### | ↑** | - | - | - |
| 4.1028 | 258.1121 | 7-Hydroxyflavanone | LMPK12140018 | C15H12O3 | - | - | - | 2.2929 | 0.5359 | ↓## |
| 4.1240 | 348.1913 | 5-(3-Pyridyl)-2-hydroxytetrahydrofuran | HMDB0062407 | C9H11NO2 | - | - | - | 1.7703 | 1.5190 | ↑# |
| 4.1240 | 162.0548 | 2-Indolecarboxylic acid | 6593 | C9H7NO2 | 1.0853 | 1.9290 | ↑** | - | - | - |
| 4.1240 | 170.1174 | 7-oxo-8-amino-nonanoic acid | LMFA01060168 | C9H17NO3 | 1.2815 | 1.4714 | ↑** | - | - | - |
| 4.1437 | 361.1389 | 3-Methoxytyramine-βxanthin | 64466 | C18H20N2O6 | 1.4372 | 3.7819 | ↑** | 1.8431 | 0.6697 | ↓# |
| 4.1635 | 128.1071 | 1-ACETYLPIPERIDINE | 263509 | C7H13NO | 1.2664 | 2.5928 | ↑** | - | - | - |
| 4.1858 | 339.1335 | L-L-Homoglutathione | HMDB0029395 | C11H19N3O6S | 1.1510 | ####### | ↑** | - | - | - |
| 4.2248 | 180.1017 | Phenacetine | 486 | C10H13NO2 | 1.2870 | ####### | ↑** | - | - | - |
| 4.2479 | 174.1124 | Acetyl-DL-Leucine | 73549 | C8H15NO3 | 1.3002 | 2.6509 | ↑** | - | - | - |
| 4.2881 | 404.1699 | 4'-Hydroxychalcone 4'-glucoside | LMPK12120187 | C21H22O7 | 1.4638 | ####### | ↑** | - | - | - |
| 4.3094 | 186.1123 | 4-Ipomeanol | HMDB0030472 | C9H12O3 | - | - | - | 1.5937 | 0.4018 | ↓# |
| 4.3268 | 134.0600 | Oxindole | 34541 | C8H7NO | 1.1006 | 3.0257 | ↑** | - | - | - |
| 4.3457 | 260.1855 | (±)-Hexanoylcarnitine | 85174 | C13H25NO4 | 1.3529 | 2.2226 | ↑** | - | - | - |
| 4.3457 | 204.1229 | Succinylmonocholine | 2522 | C9H17NO4 | 1.5150 | 9.9624 | ↑** | - | - | - |
| 4.4457 | 242.1172 | Mefenamic acid | 1098 | C15H15NO2 | 1.5603 | ####### | ↑** | 1.5862 | 0.8065 | ↓# |
| 4.4457 | 220.0966 | alpha-Hydroxy-1-methyl-1H-indole-3-propanoic acid | 93058 | C12H13NO3 | - | - | - | 1.5734 | 0.1343 | ↓# |
| 4.4630 | 238.1071 | N-lactoyl-phenylalanine | 263655 | C12H15NO4 | 1.4782 | 30.2940 | ↑** | 1.6382 | 0.6230 | ↓# |
| 4.4630 | 247.1074 | N-Acetyl-DL-tryptophan | 34535 | C13H14N2O3 | 1.1671 | 3.0938 | ↑** | - | - | - |
| 4.4630 | 303.1700 | Morphine | HMDB0014440 | C17H19NO3 | 1.3652 | ####### | ↑** | - | - | - |
| 4.5026 | 257.0554 | cis,trans-5'-Hydroxythalidomide | HMDB0013870 | C13H10N2O5 | - | - | - | 1.6291 | 0.3522 | ↓# |
| 4.5623 | 186.0548 | Indolepyruvate | HMDB0060484 | C11H9NO3 | - | - | - | 1.6842 | 0.3459 | ↓# |
| 4.5623 | 309.1806 | 8-Hydroxycarteolol | HMDB0060990 | C16H24N2O4 | 1.2382 | ####### | ↑** | - | - | - |
| 4.5623 | 872.5389 | PGP(18:0/18:2(9Z,12Z)) | HMDB0013507 | C42H80O13P2 | 1.0731 | 0.7719 | ↓** | - | - | - |
| 4.5623 | 173.0808 | 4,7-dioxo-octanoic acid | 74790 | C8H12O4 | 1.0943 | 1.5541 | ↑** | - | - | - |
| 4.6245 | 281.1281 | Asparaginyl-Methionine | HMDB0028737 | C9H17N3O4S | 1.5479 | ####### | ↑** | 1.6148 | 0.7995 | ↓# |
| 4.6670 | 260.2217 | 14-hydroxy-12-tetradecenoic acid | LMFA01050178 | C14H26O3 | 1.1256 | 4.1156 | ↑** | - | - | - |
| 4.6886 | 417.2434 | 4-ethylamino-6-isopropylamino-1,3,5-triazin-2-ol | HMDB0062766 | C8H15N5O | 1.1128 | 3.2542 | ↑** | 1.6181 | 1.7273 | ↑# |
| 4.6886 | 219.1377 | 12,13-Dimethyl-5,14-dioxabicyclo[9.2.1]-  tetradeca-1(13),11-dien-4-one | LMFA07040039 | C14H20O3 | - | - | - | 1.6060 | 0.5759 | ↓# |
| 4.7767 | 232.1694 | Rotundine A | 90578 | C15H21NO | 1.2632 | 1.6028 | ↑** | - | - | - |
| 4.7977 | 319.1649 | 3-(3,4-dihydroxyphenyl)-N-[2-(4-hydroxyphenyl)ethyl]-  propanimidic acid | HMDB0137011 | C17H19NO4 | 1.4647 | ####### | ↑** | - | - | - |
| 4.8188 | 286.2010 | Bisacurone epoxide | HMDB0038503 | C15H24O4 | 1.4371 | 4.3017 | ↑** | - | - | - |
| 4.8412 | 165.0910 | 5-oxo-7-decynoic acid | LMFA01030579 | C10H14O3 | 1.3205 | 1.8229 | ↑** | - | - | - |
| 4.8412 | 592.3703 | Hydroxydestruxin B | HMDB0040135 | C30H51N5O8 | 1.2283 | 0.5803 | ↓** | - | - | - |
| 4.8636 | 169.0858 | 4-Hydroxy-3-methoxyphenethyl alcohol | 263609 | C9H12O3 | 1.1789 | 1.2422 | ↑** | - | - | - |
| 4.8636 | 252.1227 | Aloesol | HMDB0035712 | C13H14O4 | 1.4621 | ####### | ↑** | - | - | - |
| 4.9302 | 255.0649 | Daidzein | 43572 | C15H10O4 | 1.0385 | 0.1154 | ↓** | - | - | - |
| 4.9512 | 297.0867 | Phenytoin methylcatechol | HMDB0060867 | C16H12N2O4 | 1.4499 | 17.3611 | ↑** | 1.6101 | 0.3938 | ↓# |
| 4.9512 | 321.1805 | 6-Hydroxyetodolac | HMDB0060543 | C17H21NO4 | 1.2787 | ####### | ↑** | - | - | - |
| 4.9734 | 301.1180 | 5-NITRO-2-PHENYLPROPYLAMINOBENZOIC ACID [NPPB] | 44306 | C16H16N2O4 | 1.2800 | ####### | ↑** | - | - | - |
| 4.9734 | 355.1259 | Allithiamine | HMDB0031758 | C15H22N4O2S2 | 1.0287 | ####### | ↑* | - | - | - |
| 4.9734 | 231.0763 | 5-Hydroxyindoleacetylglycine | HMDB0004185 | C12H12N2O4 | 1.1325 | 0.2011 | ↓** | - | - | - |
| 4.9960 | 333.2419 | 11-deoxy-11-methylene-PGD2 | 36167 | C21H34O4 | 1.0121 | ####### | ↑* | - | - | - |
| 4.9960 | 274.2373 | Ipomeatetrahydrofuran | HMDB0040904 | C15H28O3 | 1.1583 | ####### | ↑** | - | - | - |
| 5.0405 | 214.0860 | Fenamic acid | 69644 | C13H11NO2 | 1.1360 | 3.1195 | ↑** | - | - | - |
| 5.0405 | 333.1441 | Citpressine II | HMDB0029324 | C17H17NO5 | 1.3148 | ####### | ↑** | - | - | - |
| 5.0623 | 377.1339 | N-Acetylserotonin glucuronide | HMDB0060833 | C18H22N2O8 | 1.2840 | ####### | ↑** | - | - | - |
| 5.0842 | 349.2369 | 15(R)-15-methyl Prostaglandin A2 | 45405 | C21H32O4 | 1.0858 | 2.7869 | ↑** | - | - | - |
| 5.0842 | 514.2831 | Sulfolithocholylglycine | HMDB0002639 | C26H43NO7S | 1.3240 | 3.7955 | ↑** | - | - | - |
| 5.1954 | 309.0865 | Flazine | 89289 | C17H12N2O4 | - | - | - | 2.0335 | ####### | ↑## |
| 5.2177 | 310.2010 | Acetylbalchanolide | HMDB0036693 | C17H24O4 | 1.3354 | 3.1043 | ↑** | - | - | - |
| 5.2621 | 288.2166 | (±)-Octanoylcarnitine | 85173 | C15H29NO4 | 1.2167 | 1.8416 | ↑** | - | - | - |
| 5.2621 | 329.2470 | 6-((Z)-pentadec-10-en-1-yl)salicylic acid | LMPK15040008 | C22H34O3 | 1.0507 | ####### | ↑** | - | - | - |
| 5.2845 | 351.2525 | U-44069 | 45678 | C21H34O4 | 1.2647 | ####### | ↑** | - | - | - |
| 5.3280 | 333.2056 | Gibberellin A14 aldehyde | 41222 | C20H28O4 | 1.1094 | 2.2516 | ↑** | 2.5474 | 0.2197 | ↓## |
| 5.3280 | 190.0861 | 3-Indolepropionic acid | 6602 | C11H11NO2 | 1.2715 | 0.2281 | ↓** | - | - | - |
| 5.3747 | 288.2529 | Prosopinine | 53949 | C16H33NO3 | 1.2138 | ####### | ↑** | - | - | - |
| 5.3963 | 299.2366 | 6Z,9Z,12Z,15Z,18Z-heneicosapentaenoic acid | LMFA01030823 | C21H32O2 | 1.1861 | 8.3384 | ↑** | - | - | - |
| 5.4405 | 235.0961 | 2-[2,4,6-trihydroxy-3-(3-methylbut-2-en-1-yl)phenyl]acetic acid | HMDB0125460 | C13H16O5 | - | - | - | 2.5786 | 59.6879 | ↑## |
| 5.4858 | 325.2482 | Dihydrocapsaicin | HMDB0038457 | C18H29NO3 | - | - | - | 1.5591 | 0.6291 | ↓# |
| 5.5088 | 331.2263 | 11-deoxy-11-methylene-15-keto-PGD2 | LMFA03010104 | C21H32O4 | 1.3477 | ####### | ↑** | - | - | - |
| 5.5088 | 267.1588 | 5-[2-(hydroxymethyl)-5-methylphenoxy]-  2,2-dimethyl-Pentanoic acid (Gemfibrozil M4) | 3028 | C15H22O4 | 1.2764 | 1.3495 | ↑** | - | - | - |
| 5.5088 | 293.1381 | Coriandrone B | HMDB0037775 | C16H20O5 | 1.4596 | 0.3118 | ↓** | - | - | - |
| 5.5306 | 361.2006 | HDOPA | LMST02030225 | C21H28O5 | 1.3629 | 3.1247 | ↑** | - | - | - |
| 5.5526 | 482.2935 | Taurodeoxycholic acid | HMDB0000896 | C26H45NO6S | 1.2945 | 4.0224 | ↑** | - | - | - |
| 5.5748 | 287.1386 | Pilosine | 68426 | C16H18N2O3 | 1.2968 | ####### | ↑** | - | - | - |
| 5.5971 | 327.2314 | 20-HDoHE | HMDB0060048 | C22H32O3 | 1.3636 | 7.0269 | ↑** | 1.9496 | 0.5016 | ↓## |
| 5.5971 | 363.2525 | 19,20-DiHDPA | HMDB0010214 | C22H34O4 | 1.3834 | 6.0236 | ↑** | 2.0285 | 0.5000 | ↓## |
| 5.5971 | 333.2419 | 17a-Hydroxypregnenolone | 41866 | C21H32O3 | 1.1775 | ####### | ↑** | - | - | - |
| 5.5971 | 180.1018 | N-Acetyltyramine | 263635 | C10H13NO2 | 1.4530 | ####### | ↑** | - | - | - |
| 5.5971 | 307.2011 | W123 | 64710 | C17H26N2O3 | 1.3797 | ####### | ↑** | - | - | - |
| 5.6212 | 195.0651 | (-)-trans-3,4-Dihydro-4,8-dihydroxy-3-methyl  -1H-2-benzopyran-1-one | 87184 | C10H10O4 | - | - | - | 2.7531 | 16.7865 | ↑## |
| 5.6212 | 312.2165 | Tanacetol A | HMDB0035722 | C17H26O4 | 1.4849 | 4.3611 | ↑** | - | - | - |
| 5.6648 | 571.3391 | N-Monodesmethyl-rizatriptan | HMDB0060847 | C15H19N5O | - | - | - | 2.2328 | 4.4239 | ↑## |
| 5.6648 | 377.2682 | 9'-Carboxy-gamma-chromanol | HMDB0012868 | C23H36O4 | 1.2299 | 4.6117 | ↑** | - | - | - |
| 5.6648 | 341.2471 | (3alpha,5beta,11beta,17beta)-9-Fluoro-17-methylandrostane-3,11,17-triol | 70206 | C20H33FO3 | 1.3195 | 7.4774 | ↑** | - | - | - |
| 5.6876 | 498.2881 | Taurocholic acid | 34542 | C26H45NO7S | 1.4050 | 6.4043 | ↑** | - | - | - |
| 5.7100 | 169.1222 | (1beta,2beta,5beta)-p-Menth-3-ene-1,2,5-triol | HMDB0038978 | C10H18O3 | 1.3908 | 1.6956 | ↑** | - | - | - |
| 5.7324 | 345.2056 | 1alpha,17alpha,21-trihydroxy-20-oxo-22,23,24,25,26,27-  hexanorvitamin D3 / 1alpha,17alpha,21-trihydroxy-  20-oxo-22,23,24,25,26,27-hexanorcholecalciferol | LMST03020005 | C21H30O5 | 1.2077 | 0.5332 | ↓** | - | - | - |
| 5.7540 | 389.1701 | 3,4,5,6-Tetrahydrohippuric acid | HMDB0061679 | C9H13NO3 | 1.5431 | ####### | ↑** | 1.9539 | 0.5268 | ↓## |
| 5.7754 | 315.1335 | (S)-Annocherine A | HMDB0038723 | C17H15NO4 | 1.2694 | ####### | ↑** | - | - | - |
| 5.7976 | 262.1435 | cis-1,3,4,6,7,11b-Hexahydro-9-methoxy-2H-  benzo[a]quinolizine-3-carboxylic acid | 70926 | C15H19NO3 | 1.1865 | 6.9453 | ↑** | 2.2863 | 25.7342 | ↑## |
| 5.7976 | 277.1431 | Acetylpterosin C | HMDB0030764 | C16H20O4 | - | - | - | 2.1932 | 0.6952 | ↓## |
| 5.7976 | 335.2212 | 13,14-dihydro-15-keto-PGD2 | 3817 | C20H32O5 | - | - | - | 2.3363 | 0.6343 | ↓## |
| 5.8194 | 291.1952 | 16-B1-PhytoP | LMFA02030004 | C18H28O4 | - | - | - | 2.1613 | 0.6568 | ↓## |
| 5.8632 | 290.2686 | 16-Hydroxy hexadecanoic acid | HMDB0006294 | C16H32O3 | 1.1171 | 0.6154 | ↓** | - | - | - |
| 5.8846 | 247.1325 | Loxoprofen | 1039 | C15H18O3 | 1.1570 | 1.6305 | ↑** | 1.5328 | 0.7779 | ↓# |
| 5.8846 | 585.2697 | Bilirubin | HMDB0000054 | C33H36N4O6 | 1.2380 | ####### | ↑** | - | - | - |
| 5.9070 | 329.2470 | 10,13,16-Docosatriynoic acid | LMFA01030685 | C22H32O2 | 1.3482 | ####### | ↑** | - | - | - |
| 5.9288 | 261.1483 | Emmotin A | LMPR0103200001 | C16H22O4 | 1.3053 | 2.3297 | ↑** | 2.0443 | 0.6334 | ↓## |
| 5.9288 | 334.2948 | 1-O-(2R-methoxy-4Z-tetradecenyl)-sn-glycerol | LMGL01020046 | C18H36O4 | 1.0356 | 0.6182 | ↓* | - | - | - |
| 5.9512 | 301.2522 | Cardanoldiene | HMDB0029816 | C21H32O | 1.1272 | ####### | ↑** | - | - | - |
| 5.9739 | 249.1482 | (1alpha,4alpha,5beta,6alpha,11betaH)-1,4-  Epoxy-5-hydroxy-10(14)-germacren-12,6-olide | HMDB0037005 | C15H22O4 | 1.3704 | 1.6202 | ↑** | - | - | - |
| 5.9957 | 393.2243 | TXB2 | 422 | C20H34O6 | - | - | - | 2.1337 | 0.4224 | ↓## |
| 5.9957 | 251.1639 | Procurcumadiol | HMDB0034721 | C15H22O3 | 1.3209 | 1.5368 | ↑** | - | - | - |
| 6.0400 | 275.1274 | Gossyvertin | 94215 | C16H18O4 | 1.2633 | 2.3842 | ↑** | 2.3113 | 0.4729 | ↓## |
| 6.0618 | 301.2157 | 14,15-EpETE | HMDB0010205 | C20H30O3 | 1.3105 | 2.6710 | ↑** | - | - | - |
| 6.0618 | 309.1230 | Avenalumin III | HMDB0038956 | C18H13NO3 | 1.2419 | ####### | ↑** | - | - | - |
| 6.1720 | 299.2365 | 3-(8,11,14-Pentadecatrienyl)phenol | HMDB0033862 | C21H30O | 1.4533 | ####### | ↑** | - | - | - |
| 6.2605 | 401.2097 | 10,11-DiHDPE | LMFA04000040 | C22H34O4 | 1.0708 | ####### | ↑** | - | - | - |
| 6.2827 | 311.2365 | Desogestrel | HMDB0014449 | C22H30O | 1.1780 | ####### | ↑** | - | - | - |
| 6.2827 | 320.1886 | Chloroquine | 1725 | C18H26ClN3 | 1.0956 | ####### | ↑** | - | - | - |
| 6.3055 | 301.2157 | Dehydroabietic acid | 41263 | C20H28O2 | 1.1084 | 4.8608 | ↑** | - | - | - |
| 6.3055 | 282.1121 | Methionyl-Aspartate | HMDB0028969 | C9H16N2O5S | 1.3780 | ####### | ↑** | - | - | - |
| 6.3275 | 506.2878 | 1-Oleoylglycerophosphoserine | HMDB0061694 | C24H46NO9P | 1.2694 | 4.2694 | ↑** | - | - | - |
| 6.3275 | 300.1802 | Cynaratriol | HMDB0034983 | C15H22O5 | 1.4624 | 3.8809 | ↑** | - | - | - |
| 6.3920 | 163.1116 | 4,4alpha,5,6-Tetrahydro-7-methyl-2(3H)-naphthalenone | 94352 | C11H14O | 1.1819 | 1.3242 | ↑** | - | - | - |
| 6.3920 | 331.1898 | 12-oxo-Resolvin E1 | LMFA03140010 | C20H28O5 | 1.4599 | ####### | ↑** | - | - | - |
| 6.4146 | 347.1597 | N-trans-Feruloyloctopamine | HMDB0032805 | C18H19NO5 | 1.0602 | ####### | ↑** | - | - | - |
| 6.4805 | 522.2861 | 2-(2,4-dihydroxy-5-methoxyphenyl)-3-(3,7-dimethylocta-  2,6-dien-1-yl)-7-hydroxy-8-(3-methylbut-2-en-1-yl)-  4H-chromen-4-one | HMDB0129710 | C31H36O6 | 1.0953 | 6.5325 | ↑** | - | - | - |
| 6.4805 | 418.2120 | Cadabicine | HMDB0033451 | C25H29N3O4 | 1.2520 | ####### | ↑** | - | - | - |
| 6.4805 | 192.1381 | diethyltoluamide | 3982 | C12H17NO | 1.4471 | 1.5033 | ↑** | - | - | - |
| 6.5032 | 162.0548 | 4-Hydroxy-2-quinolone | 71293 | C9H7NO2 | 1.0808 | 6.4227 | ↑** | - | - | - |
| 6.5481 | 317.2107 | 18R-Resolvin E3 | LMFA03140006 | C20H30O4 | 1.3179 | 5.3175 | ↑** | - | - | - |
| 6.5711 | 223.1690 | 9Z-Dodecen-7-ynyl acetate | 46246 | C14H22O2 | 1.3266 | 1.9931 | ↑** | - | - | - |
| 6.5711 | 273.1232 | Ketorolac | HMDB0014608 | C15H13NO3 | 1.0076 | 0.2586 | ↓* | - | - | - |
| 6.6143 | 333.2418 | 5-cis Carbaprostacyclin | 45623 | C21H34O4 | 1.3785 | ####### | ↑** | - | - | - |
| 6.6143 | 315.2314 | 17alpha,20alpha-Dihydroxypregn-4-en-3-one | HMDB0011653 | C21H32O3 | 1.4853 | ####### | ↑** | - | - | - |
| 6.6143 | 239.1639 | Sundiversifolide | LMPR0103390002 | C14H22O3 | 1.1937 | 1.6036 | ↑** | - | - | - |
| 6.6365 | 466.2985 | Lithocholyltaurine | HMDB0000722 | C26H45NO5S | 1.0124 | ####### | ↑* | - | - | - |
| 6.6588 | 486.2571 | PE(17:2(9Z,12Z)/0:0) | LMGP02050016 | C22H42NO7P | 1.3841 | 0.4062 | ↓** | - | - | - |
| 6.6816 | 323.2212 | (8)-Gingerol | 71735 | C19H30O4 | 1.1683 | 7.4077 | ↑** | - | - | - |
| 6.7040 | 482.2932 | 5β-CHOLANIC ACID-3α, 12α-DIOL N-(2-SULPHOETHYL)-AMIDE | 44688 | C26H45NO6S | 1.3114 | 3.8767 | ↑** | - | - | - |
| 6.7262 | 316.2479 | Decanoyl-L-carnitine | 962 | C17H33NO4 | 1.2252 | ####### | ↑** | - | - | - |
| 6.7709 | 319.2263 | 8(9)-EpETE | 36079 | C20H30O3 | - | - | - | 1.6201 | 0.5685 | ↓# |
| 6.7709 | 298.1434 | Lansamide 3 | 90054 | C18H19NO3 | 1.5392 | ####### | ↑** | - | - | - |
| 6.7931 | 352.0413 | MELOXICAM | 44146 | C14H13N3O4S2 | 1.0416 | ####### | ↑* | 2.7075 | 40.7658 | ↑## |
| 6.7931 | 315.1950 | PGB3 | LMFA03010141 | C20H28O4 | 1.2755 | ####### | ↑** | - | - | - |
| 6.7931 | 342.2633 | 3-hydroxydodecanoyl carnitine | HMDB0061638 | C19H37NO5 | 1.4389 | 3.5810 | ↑** | - | - | - |
| 6.8159 | 252.1015 | Cysteinyl-Hydroxyproline | HMDB0028776 | C8H14N2O4S | 1.5442 | ####### | ↑** | - | - | - |
| 6.8159 | 429.2413 | Glycyl-Lysine | HMDB0028846 | C8H17N3O3 | 1.0253 | ####### | ↑* | - | - | - |
| 6.8159 | 225.1959 | N,N'-Dicyclohexylurea | 34503 | C13H24N2O | 1.1484 | 1.4260 | ↑** | - | - | - |
| 6.8586 | 393.1801 | O-Desmethylcarvedilol | 1571 | C23H24N2O4 | 1.4668 | ####### | ↑** | - | - | - |
| 6.8797 | 289.1798 | Estriol | HMDB0000153 | C18H24O3 | - | - | - | 1.9101 | 0.4514 | ↓## |
| 6.8797 | 231.1125 | 6-Hydroxymelatonin | HMDB0004081 | C13H16N2O3 | 1.0802 | ####### | ↑** | - | - | - |
| 6.9027 | 335.2576 | 21-hydroxyallopregnanolone | 41885 | C21H34O3 | 1.3981 | ####### | ↑** | - | - | - |
| 6.9678 | 373.2732 | 3alpha-Hydroxy-5beta-chola-7,9(11)-dien-24-oic Acid | LMST04010330 | C24H36O3 | 1.0553 | 7.5702 | ↑** | - | - | - |
| 6.9678 | 469.3266 | 2beta-methoxy-1alpha,25-dihydroxyvitamin D3 | LMST03020603 | C28H46O4 | 1.2209 | ####### | ↑** | - | - | - |
| 6.9678 | 817.5792 | 3alpha,11alpha,12alpha-Trihydroxy-5beta-cholan-24-oic Acid | LMST04010370 | C24H40O5 | 1.0128 | ####### | ↑* | - | - | - |
| 6.9678 | 313.2157 | Ethisterone | HMDB0060580 | C21H28O2 | 1.1180 | ####### | ↑** | - | - | - |
| 6.9678 | 498.3419 | Crustecdysone | HMDB0030180 | C27H44O7 | 1.1098 | ####### | ↑** | - | - | - |
| 6.9898 | 615.3149 | Mesobilirubinogen | HMDB0001898 | C33H44N4O6 | 1.3105 | 5.6486 | ↑** | - | - | - |
| 7.0974 | 597.3634 | L-Urobilinogen | HMDB0004157 | C33H48N4O6 | 1.2277 | ####### | ↑** | - | - | - |
| 7.0974 | 305.1854 | Ritodrine | HMDB0015005 | C17H21NO3 | 1.3123 | ####### | ↑** | - | - | - |
| 7.1854 | 165.0754 | L-Rhamnofuranose | 63161 | C6H12O5 | - | - | - | 1.7487 | 0.7380 | ↓# |
| 7.2072 | 432.2377 | Clausarinol | HMDB0041407 | C24H30O6 | 1.1547 | 2.1511 | ↑** | - | - | - |
| 7.2298 | 399.3253 | 1α,18-dihydroxyvitamin D3 / 1α,18-dihydroxycholecalciferol | 42191 | C27H44O3 | 1.3848 | 8.7725 | ↑** | 1.6591 | 2.0172 | ↑# |
| 7.2298 | 333.2419 | 9-deoxy-9-methylene-PGE2 | LMFA03010058 | C21H34O4 | 1.4156 | ####### | ↑** | - | - | - |
| 7.2746 | 349.2369 | 17alpha,21-Dihydroxypregnenolone | HMDB0006762 | C21H32O4 | 1.2550 | 5.8127 | ↑** | 1.6822 | 0.4482 | ↓# |
| 7.2968 | 440.2767 | PC(12:0/0:0) | LMGP01050009 | C20H42NO7P | - | - | - | 1.5894 | 2.9346 | ↑# |
| 7.3188 | 616.1753 | Pelargonidin 3-sophoroside | HMDB0033679 | C28H33O14+ | - | - | - | 1.5672 | 0.5950 | ↓# |
| 7.3418 | 347.2212 | 1α,21-dihydroxy-20-oxo-22,23,24,25,26,27-hexanorvitamin D3 / 1α,21-dihydroxy-20-oxo-22,23,24,25,26,27-hexanorcholecalciferol | 41945 | C21H30O4 | 1.2986 | ####### | ↑** | - | - | - |
| 7.3418 | 458.3471 | O-(17-carboxyheptadecanoyl)carnitine | LMFA07070085 | C25H47NO6 | 1.1596 | 5.0906 | ↑** | - | - | - |
| 7.3642 | 317.2471 | 5alpha-pregnane-3,20-dione | 57865 | C21H32O2 | 1.3109 | ####### | ↑** | - | - | - |
| 7.3862 | 344.2791 | Dodecanoylcarnitine | 34490 | C19H37NO4 | 1.4054 | 2.5908 | ↑** | - | - | - |
| 7.5178 | 193.1222 | 2E,6E,8E,10E-dodecatetraenoic acid | 34906 | C12H16O2 | 1.2754 | 1.5359 | ↑** | - | - | - |
| 7.5178 | 147.1167 | 4-Isopentylphenol | 70269 | C11H16O | 1.3002 | 1.5566 | ↑** | - | - | - |
| 7.5178 | 151.0753 | 1-Phenylethyl formate | 92538 | C9H10O2 | 1.3743 | 1.5110 | ↑** | - | - | - |
| 7.5833 | 233.1534 | Germacrone-13-al | HMDB0036881 | C15H20O2 | 1.2676 | 1.4625 | ↑** | - | - | - |
| 7.5833 | 394.2946 | MG(0:0/20:5(5Z,8Z,11Z,14Z,17Z)/0:0) | HMDB0011550 | C23H36O4 | 1.3040 | 7.0638 | ↑** | - | - | - |
| 7.6056 | 351.2524 | (10)-Gingerol | 71736 | C21H34O4 | 1.1322 | 6.2069 | ↑** | - | - | - |
| 7.6056 | 547.2182 | Nilotinib | HMDB0015595 | C28H22F3N7O | 1.5290 | ####### | ↑** | - | - | - |
| 7.6267 | 298.2738 | Cassine | 68143 | C18H35NO2 | - | - | - | 1.5558 | 0.7031 | ↓# |
| 7.6267 | 191.1065 | (Z)-3-Oxo-2-(2-pentenyl)-1-cyclopenteneacetic acid | HMDB0030197 | C12H16O3 | 1.0114 | 1.3142 | ↑* | - | - | - |
| 7.6267 | 311.1848 | Botrydial | LMPR0103640001 | C17H26O5 | 1.0132 | 1.2447 | ↑* | - | - | - |
| 7.6493 | 253.1795 | 1-Hydroxyepiacorone | HMDB0030918 | C15H24O3 | 1.3730 | 2.0300 | ↑** | - | - | - |
| 7.7182 | 423.1906 | Carvedilol(p-Hydroxy) | 1565 | C24H26N2O5 | 1.1754 | ####### | ↑** | - | - | - |
| 7.7852 | 301.2158 | 10,12,14-octadecatrienoic acid | LMFA01030154 | C18H30O2 | - | - | - | 1.6519 | 0.6134 | ↓# |
| 7.7852 | 394.2948 | (9Z,12Z)-3-hydroxyhexadecadienoylcarnitine | LMFA07070026 | C23H41NO5 | 1.0878 | 1.7547 | ↑** | - | - | - |
| 7.8083 | 406.2429 | methyl 9-hydroperoxy-10,12,13,15-bisepidioxy-16E-octadecenoate | LMFA01040051 | C19H32O8 | - | - | - | 1.6255 | 1.5298 | ↑# |
| 7.8300 | 370.2948 | 3-hydroxytetradecanoyl carnitine | HMDB0061640 | C21H41NO5 | 1.3900 | 2.7220 | ↑** | - | - | - |
| 7.8300 | 179.1429 | 4-n-Hexylphenol | 70082 | C12H18O | 1.3809 | 2.3433 | ↑** | - | - | - |
| 7.9636 | 135.0804 | 2,5-Dimethylbenzaldehyde | 265044 | C9H10O | 1.1151 | 1.4043 | ↑** | - | - | - |
| 7.9858 | 460.2689 | Pectachol | HMDB0039064 | C26H34O6 | 1.4801 | 2.5957 | ↑** | 1.5453 | 1.3482 | ↑# |
| 7.9858 | 249.1846 | 5-Pentyl-2-furanheptanoic acid | HMDB0112092 | C16H26O3 | 1.1943 | 2.3337 | ↑** | - | - | - |
| 8.0082 | 501.2989 | 3alpha,7alpha,12alpha-Trihydroxy-24-methyl-5beta-cholest-23-en-26-oic acid | LMST04040005 | C28H46O5 | 1.2468 | ####### | ↑** | - | - | - |
| 8.0305 | 251.1639 | 4,11,13,15-Tetrahydroridentin B | HMDB0036150 | C15H24O4 | - | - | - | 1.6196 | 0.8262 | ↓# |
| 8.0305 | 188.1069 | 1-(2,3-Dihydro-1H-pyrrolizin-5-yl)-1,4-pentanedione | HMDB0040046 | C12H15NO2 | 1.3296 | 1.5551 | ↑** | - | - | - |
| 8.0749 | 249.1482 | 1alpha-1-Hydroxy-2,4(18),11(13)-eudesmatrien-12-oic acid | HMDB0037557 | C15H20O3 | 1.2863 | 2.4268 | ↑** | - | - | - |
| 8.0975 | 396.3105 | MG(0:0/20:4(8Z,11Z,14Z,17Z)/0:0) | HMDB0011549 | C23H38O4 | 1.2746 | 3.0820 | ↑** | - | - | - |
| 8.1649 | 492.3081 | PS(P-18:0/0:0) | LMGP03070002 | C24H48NO8P | 1.0862 | 1.6408 | ↑** | - | - | - |
| 8.2094 | 319.2265 | 15(S)-HPETE | HMDB0004244 | C20H32O4 | - | - | - | 1.9902 | 0.5695 | ↓## |
| 8.2094 | 177.1273 | 3-(4-Isopropylphenyl)propanal | 91320 | C12H16O | 1.3362 | 1.5863 | ↑** | - | - | - |
| 8.2318 | 195.1378 | Neocnidilide | 71493 | C12H18O2 | 1.2936 | 1.5380 | ↑** | - | - | - |
| 8.2318 | 201.1635 | Alpha-Calacorene | 265068 | C15H20 | 1.0076 | 2.9873 | ↑* | - | - | - |
| 8.2542 | 207.1378 | Methyl 4-tert-butylphenylacetate | 91385 | C13H18O2 | 1.0380 | 1.4412 | ↑* | - | - | - |
| 8.2769 | 300.2894 | Sphingosine | 392 | C18H37NO2 | 1.1229 | 2.1954 | ↑** | 2.0484 | 0.5084 | ↓## |
| 8.2769 | 163.1480 | 1,3-Diisopropylbenzene | 85265 | C12H18 | 1.3105 | 2.8582 | ↑** | - | - | - |
| 8.2978 | 362.0397 | Haloxyfop | 66271 | C15H11ClF3NO4 | 1.1872 | 1.4343 | ↑** | - | - | - |
| 8.3202 | 332.2788 | 18-hydroxy-9R,10S-epoxy-stearic acid | LMFA02000003 | C18H34O4 | - | - | - | 1.5437 | 0.2282 | ↓# |
| 8.3202 | 333.2055 | PGJ3 | 36227 | C20H28O4 | 1.1094 | 4.0482 | ↑** | - | - | - |
| 8.3425 | 372.3104 | (±)-Myristoylcarnitine | 85175 | C21H41NO4 | 1.3084 | 2.1102 | ↑** | - | - | - |
| 8.3648 | 263.2003 | 10E,16-heptadecadien-8-ynoic acid | LMFA01030475 | C17H26O2 | - | - | - | 2.3388 | 0.5618 | ↓## |
| 8.3648 | 380.2556 | Sphingosine-1-phosphate | 3891 | C18H38NO5P | 1.1810 | 0.5737 | ↓** | - | - | - |
| 8.3873 | 377.1953 | 18-Oxocortisol | HMDB0000332 | C21H28O6 | - | - | - | 1.8015 | 1.8607 | ↑# |
| 8.4088 | 205.1585 | 9Z,13-Tetradecadien-11-ynal | 46470 | C14H20O | 1.4868 | 4.0830 | ↑** | - | - | - |
| 8.4524 | 561.2335 | Labriformidin | 67235 | C29H36O11 | 1.0413 | ####### | ↑* | - | - | - |
| 8.4753 | 269.1645 | 10-alpha-methoxy-9,10-dihydrolysergol | HMDB0060995 | C17H22N2O2 | 1.1962 | 85.3595 | ↑** | 1.7772 | 2.1863 | ↑# |
| 8.4753 | 287.2213 | 16-Hydroxy-10-oxohexadecanoic acid | 95701 | C16H30O4 | 1.2622 | 3.8573 | ↑** | - | - | - |
| 8.4983 | 302.3050 | Sphinganine | 395 | C18H39NO2 | 1.3463 | 3.6474 | ↑** | 2.2196 | 0.4454 | ↓## |
| 8.4983 | 476.2766 | LysoPE(18:3(9Z,12Z,15Z)/0:0) | HMDB0011509 | C23H42NO7P | 1.3238 | ####### | ↑** | - | - | - |
| 8.5200 | 518.3239 | LysoPC(18:3(9Z,12Z,15Z)) | HMDB0010388 | C26H48NO7P | 1.3747 | 2.3745 | ↑** | - | - | - |
| 8.5200 | 385.3095 | 26:6(8Z,11Z,14Z,17Z,20Z,23Z) | LMFA01030838 | C26H40O2 | 1.4760 | ####### | ↑** | - | - | - |
| 8.5407 | 480.3081 | PC(15:1(9Z)/0:0) | LMGP01050125 | C23H46NO7P | 1.1520 | 0.5283 | ↓** | 1.7347 | 1.6606 | ↑# |
| 8.5629 | 395.2939 | 25-hydroxy-16,17,23,23,24,24-hexadehydrovitamin D3 / 25-hydroxy-16,17,23,23,24,24-hexadehydrocholecalciferol | LMST03020091 | C27H38O2 | 1.1862 | ####### | ↑** | - | - | - |
| 8.5629 | 413.3044 | Valenciachrome | 91858 | C27H40O3 | 1.2895 | ####### | ↑** | - | - | - |
| 8.5629 | 263.1640 | Methyl (3b,11x)-3-Hydroxy-8-oxo-6-eremophilen-12-oate | HMDB0041229 | C16H24O4 | 1.0101 | 1.7774 | ↑* | - | - | - |
| 8.5629 | 149.0960 | 2-Hydroxy-p-mentha-1,8-dien-6-one | HMDB0037012 | C10H14O2 | 1.0698 | 1.7249 | ↑** | - | - | - |
| 8.5861 | 284.2945 | 3Z,13Z-octadecadien-1-ol | LMFA05000047 | C18H34O | 1.1796 | 1.8221 | ↑** | - | - | - |
| 8.6538 | 397.3097 | 20S-Hydroxycholest-1-en-3,16-dione | LMST01010309 | C27H42O3 | 1.2765 | 3.1705 | ↑** | - | - | - |
| 8.6979 | 386.3260 | Pentadecanoylcarnitine | HMDB0062517 | C22H43NO4 | 1.0427 | 1.5290 | ↑* | - | - | - |
| 8.7429 | 319.2264 | 11-deoxy-PGE2 | 36132 | C20H32O4 | 1.3027 | 3.0579 | ↑** | 1.7160 | 0.6261 | ↓# |
| 8.7653 | 410.2321 | Prostratol F | LMPK12140046 | C25H28O4 | 1.3714 | 5.5456 | ↑** | - | - | - |
| 8.7885 | 389.2298 | 5(S),6(R)-Lipoxin A4 methyl ester | 45371 | C21H34O5 | 1.1423 | 0.1357 | ↓** | - | - | - |
| 8.8103 | 291.1951 | 9-B1-PhytoP | LMFA02030025 | C18H28O4 | 1.0666 | 1.4205 | ↑** | - | - | - |
| 8.8103 | 189.1272 | 2-tridecene-4,7-diynal | 75354 | C13H16O | 1.2058 | 1.4228 | ↑** | - | - | - |
| 8.8772 | 529.2077 | Physalin O | 93687 | C28H32O10 | 1.4541 | ####### | ↑** | - | - | - |
| 8.8772 | 476.2405 | 2-Hydroxy-desipramine glucuronide | HMDB0060716 | C24H30N2O7 | 1.3735 | 0.3859 | ↓** | - | - | - |
| 8.9003 | 683.3417 | Natamycin | HMDB0014964 | C33H47NO13 | 1.0407 | 123.7723 | ↑* | 1.5971 | 2.9340 | ↑# |
| 8.9233 | 265.1950 | Vitamin A2 aldehyde | HMDB0035695 | C20H26O | - | - | - | 1.5370 | 0.4520 | ↓# |
| 8.9233 | 301.2159 | 4-OH-Retinal | HMDB0012788 | C20H28O2 | - | - | - | 1.8515 | 0.6737 | ↓# |
| 8.9233 | 427.2839 | (23S,25R)-25-hydroxyvitamin D3 26,23-peroxylactone / (23S,25R)-25-hydroxycholecalciferol 26,23-peroxylactone | LMST03020121 | C27H40O5 | 1.1814 | ####### | ↑** | - | - | - |
| 8.9448 | 526.2927 | LysoPE(22:6(4Z,7Z,10Z,13Z,16Z,19Z)/0:0) | HMDB0011526 | C27H44NO7P | 1.1178 | 2.9176 | ↑** | - | - | - |
| 8.9661 | 207.1741 | Longicamphenylone | 265086 | C14H22O | 1.4158 | 5.5066 | ↑** | 1.6245 | 1.8186 | ↑# |
| 8.9661 | 444.3679 | 12-Hydroxy-12-octadecanoylcarnitine | LMFA07070028 | C25H49NO5 | 1.0882 | 1.6024 | ↑** | - | - | - |
| 9.0309 | 520.3395 | LysoPC(18:2(9Z,12Z)) | HMDB0010386 | C26H50NO7P | 1.0360 | 1.3448 | ↑* | - | - | - |
| 9.0737 | 249.1846 | 4-Hydroxy-3-methoxy-2,10-bisaboladien-9-one | HMDB0033917 | C16H26O3 | 1.2150 | 1.2947 | ↑** | - | - | - |
| 9.1184 | 269.2108 | Methoprene acid | 43446 | C16H28O3 | 1.3601 | 3.5517 | ↑** | - | - | - |
| 9.1411 | 528.3077 | LysoPE(0:0/22:5(7Z,10Z,13Z,16Z,19Z)) | HMDB0011495 | C27H46NO7P | 1.0074 | 2.4092 | ↑* | - | - | - |
| 9.2500 | 327.2315 | 15beta-Hydroxydesogestrel | HMDB0060707 | C22H30O2 | - | - | - | 2.2529 | 0.5687 | ↓## |
| 9.2500 | 295.2265 | 9(S)-HOTrE | 36030 | C18H30O3 | 1.1082 | 0.6335 | ↓* | - | - | - |
| 9.2951 | 315.2525 | 12,13-DHOME | HMDB0004705 | C18H34O4 | 1.1639 | 2.1835 | ↑** | - | - | - |
| 9.2951 | 433.3308 | 3alpha,12alpha,22-Trihydroxy-5beta-cholestan-26-oic acid | LMST04030061 | C27H46O5 | 1.0087 | 8.4094 | ↑* | - | - | - |
| 9.3398 | 267.2103 | Retinal | HMDB0001358 | C20H28O | - | - | - | 2.1107 | 0.6254 | ↓## |
| 9.3398 | 303.2314 | 5Z,8Z,14Z-Eicosatrien-11-ynoic acid | LMFA01030693 | C20H30O2 | - | - | - | 2.1415 | 0.6001 | ↓## |
| 9.3398 | 179.1064 | 5-Phenylvaleric acid | 6456 | C11H14O2 | - | - | - | 2.2314 | 0.7533 | ↓## |
| 9.3398 | 201.1271 | 5,7,9,11,13-tetradecapentaenoic acid | 34922 | C14H18O2 | - | - | - | 2.0149 | 0.5993 | ↓## |
| 9.3398 | 237.1845 | 2-Hydroxyacorenone | HMDB0030916 | C15H24O2 | - | - | - | 1.8576 | 0.6926 | ↓# |
| 9.3398 | 454.2923 | PE(16:0/0:0) | 40776 | C21H44NO7P | 1.2715 | 2.6568 | ↑** | - | - | - |
| 9.3398 | 249.1845 | tetranor-12(S)-HETE | 44857 | C16H26O3 | 1.0639 | 1.8170 | ↑** | - | - | - |
| 9.3833 | 428.3730 | Stearoylcarnitine | HMDB0000848 | C25H49NO4 | 1.5175 | 2.5430 | ↑** | - | - | - |
| 9.5107 | 442.3888 | 2,6,10,10-Tetramethyl-1-oxaspiro[4.5]decan-6-ol | HMDB0037907 | C13H24O2 | 1.4500 | 2.8738 | ↑** | - | - | - |
| 9.5324 | 295.2264 | alpha-kamlolenic acid | LMFA02000156 | C18H30O3 | 1.1852 | 2.7888 | ↑** | 1.5910 | 2.1879 | ↑# |
| 9.5324 | 440.2404 | O-(13-carboxytridecanoyl)carnitine | LMFA07070084 | C21H39NO6 | 1.4725 | 0.5016 | ↓** | - | - | - |
| 9.5762 | 438.2975 | CPA(18:0/0:0) | HMDB0007004 | C21H41O6P | - | - | - | 1.6095 | 0.6536 | ↓# |
| 9.6425 | 329.2471 | (4E,7E,10Z,13E,16E,19E)-docosa-4,7,10,13,16,19-hexaenoic acid | 64830 | C22H32O2 | - | - | - | 2.0501 | 0.4495 | ↓## |
| 9.6877 | 307.2627 | 2E,4E,8Z-eicosatrienoic acid | LMFA01030379 | C20H34O2 | - | - | - | 2.1177 | 0.4307 | ↓## |
| 9.6877 | 321.2420 | (+)-Beyerol | 53635 | C20H32O3 | - | - | - | 2.4479 | 0.4271 | ↓## |
| 9.7103 | 456.4043 | Arachidyl carnitine | HMDB0006460 | C27H53NO4 | 1.4524 | 2.6978 | ↑** | - | - | - |
| 9.7539 | 209.1898 | 6,10-dimethyl-9-methylene-undec-5E-en-2-one | 53361 | C14H24O | 1.4556 | 1.9016 | ↑** | - | - | - |
| 9.7775 | 331.2627 | 22-hydroxy-23,24,25,26,27-pentanorvitamin D3 / 22-hydroxy-23,24,25,26,27-pentanorcholecalciferol | LMST03020010 | C22H34O2 | - | - | - | 1.8700 | 0.5397 | ↓# |
| 9.7775 | 468.3083 | PE(17:0/0:0) | 77696 | C22H46NO7P | 1.2184 | 2.4175 | ↑** | - | - | - |
| 9.8241 | 492.3081 | 1,2-Dioctanoyl PC | 45203 | C24H48NO8P | 1.3859 | 4.1218 | ↑** | - | - | - |
| 9.8908 | 444.3103 | (23S)-1alpha-hydroxy-25,27-didehydrovitamin D3 26,23-lactone | LMST03020599 | C27H38O4 | 1.3798 | ####### | ↑** | - | - | - |
| 9.9135 | 310.3100 | Geranylcitronellol | HMDB0032147 | C20H36O | 1.4228 | 1.7795 | ↑** | - | - | - |
| 10.0962 | 399.3253 | Dormatinone | LMST01010100 | C27H44O3 | 1.3476 | 2.9469 | ↑** | - | - | - |
| 10.1194 | 330.2997 | Dihydroceramide | 58540 | C19H39NO3 | 1.3154 | 4.4961 | ↑** | - | - | - |
| 10.1412 | 280.2631 | Farnesyl acetone | 265036 | C18H30O | - | - | - | 2.1997 | 1.7386 | ↑## |
| 10.2083 | 482.3236 | LysoPE(18:0/0:0) | HMDB0011130 | C23H48NO7P | 1.3167 | 2.6414 | ↑** | - | - | - |
| 10.2524 | 379.2836 | 1-AG | 62360 | C23H38O4 | 1.3495 | 4.7085 | ↑** | - | - | - |
| 10.3635 | 355.2836 | 2-Linoleoyl Glycerol | 63032 | C21H38O4 | 1.2187 | 3.1047 | ↑** | - | - | - |
| 10.3861 | 466.3288 | PE(O-18:1(9Z)/0:0) | LMGP02060004 | C23H48NO6P | - | - | - | 1.8496 | 0.6185 | ↓# |
| 10.4075 | 329.2471 | Docosahexaenoic acid | HMDB0002183 | C22H32O2 | 1.1456 | 1.4202 | ↑** | - | - | - |
| 10.4286 | 468.3447 | PE(O-18:0/0:0) | LMGP02060003 | C23H50NO6P | - | - | - | 1.9013 | 0.5934 | ↓## |
| 10.5399 | 538.3863 | PC(19:0/0:0) | LMGP01050041 | C27H56NO7P | 1.2193 | 0.5600 | ↓** | - | - | - |
| 10.5399 | 560.3679 | PC(O-16:0/3:0) | LMGP01020068 | C27H56NO7P | 1.3089 | 0.3101 | ↓** | - | - | - |
| 10.6503 | 282.2788 | 9,12,15-Octadecatrien-1-ol | LMFA05000216 | C18H32O | - | - | - | 1.7966 | 1.6779 | ↑# |
| 10.6726 | 794.5670 | PE-NMe2(18:1(9Z)/18:1(9Z)) | HMDB0010564 | C43H82NO8P | - | - | - | 1.6070 | 1.4853 | ↑# |
| 10.6726 | 801.6808 | Erucicoyl-EA | LMFA08040050 | C24H47NO2 | 1.2687 | 2.5799 | ↑** | 2.2240 | 0.5386 | ↓## |
| 10.9149 | 619.4795 | 1-(O-alpha-D-glucopyranosyl)-3-keto-(1,25R,27R)-octacosanetriol | LMFA13010023 | C34H66O9 | 1.2691 | 0.2540 | ↓** | - | - | - |
| 10.9833 | 578.4172 | PC(22:1(11Z)/0:0) | 76576 | C30H60NO7P | 1.2340 | 0.3786 | ↓** | - | - | - |
| 11.0056 | 99.0920 | xi-4,5-Dihydro-2,4(5)-dimethyl-1H-imidazole | HMDB0037787 | C5H10N2 | 1.3801 | 1.3241 | ↑** | - | - | - |
| 11.0281 | 338.3412 | 13Z-Docosenamide | 64926 | C22H43NO | 1.0758 | 1.3210 | ↑** | - | - | - |
| 11.0281 | 384.3467 | N-stearoyl valine | 75504 | C23H45NO3 | 1.1405 | 1.3514 | ↑** | - | - | - |
| 11.0504 | 161.1072 | Pseudooxynicotine | HMDB0001240 | C10H14N2O | 1.4169 | 1.3917 | ↑** | - | - | - |
| 11.0504 | 112.0871 | Histamine | 68 | C5H9N3 | 1.1813 | 1.1920 | ↑** | - | - | - |
| 11.0955 | 122.0965 | N,N-Dimethylaniline | 64944 | C8H11N | 1.4021 | 1.3507 | ↑** | - | - | - |
| 11.1409 | 604.4328 | Nonivamide | HMDB0029846 | C17H27NO3 | 1.0653 | 0.4172 | ↓** | - | - | - |
| 11.1632 | 700.4521 | PS(14:0/17:2(9Z,12Z)) | LMGP03010098 | C37H68NO10P | - | - | - | 1.5886 | 0.7097 | ↓# |
| 11.1632 | 756.5503 | PE-NMe2(15:0/20:3(8Z,11Z,14Z)) | HMDB0113927 | C42H78NO8P | 1.3740 | 1.7952 | ↑** | - | - | - |
| 11.2310 | 274.2737 | C16 Sphinganine | 41556 | C16H35NO2 | 1.4429 | 1.4082 | ↑** | - | - | - |
| 11.2310 | 566.4174 | PC(21:0/0:0) | LMGP01050051 | C29H60NO7P | 1.1020 | 0.2543 | ↓** | - | - | - |
| 11.3174 | 564.4382 | 1-(2-methoxy-tetracosanyl)-sn-glycero-3-phosphoethanolamine | LMGP02060028 | C30H64NO7P | - | - | - | 1.9538 | 0.4663 | ↓## |
| 11.5213 | 429.3723 | 13'-Hydroxy-alpha-tocopherol | HMDB0012559 | C29H50O3 | - | - | - | 1.6005 | 1.3636 | ↑# |
| 11.6350 | 725.5542 | SM(d18:0/16:1(9Z)) | HMDB0013464 | C39H79N2O6P | - | - | - | 1.5379 | 0.7089 | ↓# |
| 11.9047 | 606.4484 | LysoPC(24:1(15Z)) | HMDB0010406 | C32H64NO7P | 1.3559 | 0.0602 | ↓** | 1.5805 | 2.5456 | ↑# |
| 11.9047 | 732.5514 | PC(16:0/16:1(9Z)) | HMDB0007969 | C40H78NO8P | 1.1732 | 2.0169 | ↑** | - | - | - |
| 11.9280 | 706.5358 | PC(14:0/16:0) | HMDB0007869 | C38H76NO8P | 1.0138 | 1.8569 | ↑* | - | - | - |
| 11.9509 | 766.5715 | PC(20:4(5Z,8Z,11Z,14Z)/P-16:0) | HMDB0008455 | C44H80NO7P | 1.0242 | 1.8388 | ↑* | 1.8015 | 0.7552 | ↓# |
| 12.0840 | 758.5666 | PC(16:0/18:2(9Z,12Z)) | HMDB0007973 | C42H80NO8P | 1.3573 | 2.3869 | ↑** | - | - | - |
| 12.1284 | 666.4323 | PC(16:0/9:0(COOH)) | LMGP20010007 | C33H64NO10P | 1.3198 | 2.0708 | ↑** | - | - | - |
| 12.1507 | 706.4631 | PHODA-PC | LMGP20010020 | C36H68NO10P | 1.3416 | 2.3240 | ↑** | - | - | - |
| 12.1507 | 690.4675 | PS(14:0/16:0) | HMDB0012332 | C36H70NO10P | 1.3476 | 2.2723 | ↑** | - | - | - |
| 12.4191 | 161.1072 | Anatabine | HMDB0004476 | C10H12N2 | 1.1596 | 1.2739 | ↑** | - | - | - |
| 12.5086 | 854.5654 | PE-NMe(20:1(11Z)/22:6(4Z,7Z,10Z,13Z,16Z,19Z)) | HMDB0113334 | C48H82NO8P | 1.4103 | 2.9342 | ↑** | 1.8938 | 0.7300 | ↓# |
| 12.5086 | 804.5498 | PC(14:0/22:4(7Z,10Z,13Z,16Z)) | HMDB0007889 | C44H80NO8P | 1.2961 | 2.5484 | ↑** | - | - | - |
| 12.5086 | 794.6026 | PC(20:3(5Z,8Z,11Z)/P-18:1(11Z)) | HMDB0008392 | C46H84NO7P | 1.1270 | 1.7833 | ↑** | - | - | - |
| 12.7051 | 754.5350 | SM C16:1 | HMDB0029216 | C40H80N2O6P+ | 1.3150 | 29.1598 | ↑** | 1.6913 | 5.9185 | ↑# |
| 12.7282 | 664.4168 | PHODA-PE | LMGP20020027 | C33H62NO10P | 1.3422 | 2.6868 | ↑** | 1.7895 | 0.7703 | ↓# |
| 13.3872 | 834.5974 | PE(19:1(9Z)/22:2(13Z,16Z)) | LMGP02010821 | C46H86NO8P | 1.2799 | 1.8084 | ↑** | 1.7633 | 0.7694 | ↓# |
| 13.3872 | 772.5820 | PC(17:0/18:2(9Z,12Z)) | LMGP01011505 | C43H82NO8P | 1.2135 | 1.6624 | ↑** | - | - | - |
| 13.4477 | 369.3512 | (Z)-3-(henicos-14-en-1-yl)phenol | LMPK15010008 | C27H46O | 1.0503 | 1.7957 | ↑** | - | - | - |
| 14.8160 | 331.2838 | 1-Monopalmitin | 24076 | C19H38O4 | 1.4073 | 2.0157 | ↑** | - | - | - |
| 14.9190 | 169.0495 | 4-Hydroxypheoxyacetate | 65939 | C8H8O4 | 1.0321 | 1.2555 | ↑* | 1.9144 | 0.7169 | ↓## |
| 14.9190 | 127.0391 | 4-HYDROXY-6-METHYLPYRAN-2-ONE | 44653 | C6H6O3 | 1.4604 | 1.5455 | ↑** | - | - | - |
| 14.9610 | 145.0495 | (E)-3-methylglutaconic acid | 45911 | C6H8O4 | 1.4870 | 1.6287 | ↑** | - | - | - |
| 14.9610 | 117.0548 | 5-oxo-pentanoic acid | 35847 | C5H8O3 | 1.2244 | 1.3173 | ↑** | - | - | - |
| 14.9801 | 97.0288 | Furfural | 69936 | C5H4O2 | - | - | - | 2.0373 | 2.0094 | ↑## |
| 14.9801 | 101.0601 | 2,3-Pentanedione | 87796 | C5H8O2 | - | - | - | 2.4504 | 0.7067 | ↓## |
| 14.9801 | 283.2628 | Elaidic Acid | 3406 | C18H34O2 | 1.1227 | 1.4368 | ↑** | - | - | - |

1. **Negative-ion mod**

| **Rt (min)** | **m/z** | **Metabolites** | **Compound ID** | **Formula** | **Model vs. Control** | | | **SWP vs. Model** | | | |
| --- | --- | --- | --- | --- | --- | --- | --- | --- | --- | --- | --- |
| **VIP** | **FC** | **Trend** | **VIP** | **FC** | **Trend** |
| 0.9090 | 191.0187 | Galactaric acid | HMDB0000639 | C6H10O8 | 1.2508 | 0.5086 | ↓** | - | - | - |
| 1.1543 | 243.0617 | Uridine | 90 | C9H12N2O6 | 1.5441 | 2.7981 | ↑** | 1.5442 | 0.7543 | ↓# |
| 1.1543 | 252.0872 | N-lactoyl-Tyrosine | HMDB0062177 | C12H15NO5 | 1.2918 | 478000000.0000 | ↑** | - | - | - |
| 1.4281 | 189.0659 | Formyl-5-hydroxykynurenamine | HMDB0012948 | C10H12N2O3 | 2.3295 | 2.9358 | ↑** | 1.5703 | 0.5957 | ↓## |
| 1.5316 | 246.9913 | Vanillic acid 4-sulfate | HMDB0041788 | C8H8O7S | 1.5052 | 12.7236 | ↑** | 1.4198 | 4.1431 | ↑# |
| 2.4527 | 357.0823 | 6-{[3-(3,4-dihydroxyphenyl)propanoyl]oxy}  -3,4,5-trihydroxyoxane-2-carboxylic acid | HMDB0124981 | C15H18O10 | 1.8924 | 2.0939 | ↑* | 1.0393 | 0.4431 | ↓## |
| 2.6426 | 362.1023 | 5,4'-Dimethyl-6-hydroxyluteolinidin | LMPK12010444 | C17H17O6+ | 1.8542 | 1.3306 | ↑* | - | - | - |
| 3.2336 | 433.1222 | Sulfinpyrazone sulfide | HMDB0060943 | C23H20N2O2S | 1.3201 | 2.4942 | ↑** | - | - | - |
| 3.2528 | 352.0246 | Nitazoxanide | HMDB0014649 | C12H9N3O5S | 1.6419 | 35500222.0000 | ↑** | 1.3882 | 2.9117 | ↑# |
| 3.2528 | 275.1035 | (1xi,3xi)-1,2,3,4-Tetrahydro-1-methyl-beta-carboline-3-carboxylic acid | HMDB0037942 | C13H14N2O2 | 1.4138 | 3.0800 | ↑** | - | - | - |
| 3.3197 | 283.9865 | xanthurenic acid 8-O-sulfate | HMDB0059741 | C10H7NO7S | 1.6458 | 3.8941 | ↑** | 1.0796 | 0.3615 | ↓# |
| 3.3197 | 429.1535 | Kinetin | HMDB0012245 | C10H9N5O | 1.4721 | 1.7888 | ↑** | - | - | - |
| 3.4311 | 375.1324 | Pseudomonine | HMDB0041438 | C16H18N4O4 | 1.2293 | 0.6688 | ↓** | - | - | - |
| 3.4311 | 284.1248 | Glycylprolylhydroxyproline | HMDB0002171 | C12H19N3O5 | 2.2422 | 1.7224 | ↑** | 1.1621 | 0.4494 | ↓## |
| 3.4311 | 218.0452 | 8-Methoxykynurenate | HMDB0060426 | C11H9NO4 | 1.0257 | 0.1835 | ↓** | - | - | - |
| 3.6250 | 217.0611 | 4-Hydroxy-1H-indole-3-acetonitrile | HMDB0038462 | C10H8N2O | 1.3933 | 1.7189 | ↑* | - | - | - |
| 3.6470 | 202.0501 | 3-(3-Indolyl)-2-oxopropanoic acid | 43383 | C11H9NO3 | 1.4095 | 14.7329 | ↑** | - | - | - |
| 3.7110 | 609.2855 | Endomorphin-1 | HMDB0005773 | C34H38N6O5 | 1.4161 | 0.3645 | ↓* | - | - | - |
| 3.7308 | 269.0664 | Phenylglucuronide | HMDB0059806 | C12H14O7 | 1.5175 | 2.2508 | ↑* | - | - | - |
| 3.7308 | 236.0593 | N-Acetyl-L-methionine | HMDB0011745 | C7H13NO3S | 2.5292 | 3.7150 | ↑** | 1.5603 | 0.4222 | ↓## |
| 3.8384 | 239.9967 | Indole-3-carboxilic acid-O-sulphate | HMDB0060002 | C9H7NO5S | 1.1540 | 0.5450 | ↓* | - | - | - |
| 3.8384 | 230.1028 | 2-Hepteneoylglycine | HMDB0094728 | C9H15NO3 | 1.0210 | 0.7872 | ↓* | - | - | - |
| 3.9042 | 375.1301 | Riboflavin (Vitamin B2) | 233 | C17H20N4O6 | 2.1200 | 4.5690 | ↑** | 1.5678 | 0.6495 | ↓## |
| 3.9042 | 332.1249 | gamma-Glutamyltryptophan | HMDB0029160 | C16H19N3O5 | 1.8679 | 3.6533 | ↑** | 1.5682 | 0.6688 | ↓## |
| 3.9711 | 945.4881 | PGP(18:1(11Z)/22:6(4Z,7Z,10Z,13Z,16Z,19Z)) | HMDB0013531 | C46H78O13P2 | 1.0835 | 0.2667 | ↓** | - | - | - |
| 3.9711 | 242.0123 | 2-Methoxyacetaminophen sulfate | HMDB0062550 | C9H11NO6S | 1.0225 | 0.3559 | ↓** | - | - | - |
| 4.0519 | 273.0877 | 3-Pyridylacetic acid | HMDB0001538 | C7H7NO2 | 1.3348 | 5.8873 | ↑** | - | - | - |
| 4.0519 | 447.2056 | 1-Methyl-6-phenyl-1H-imidazo[4,5-b]pyridin-2-amine | HMDB0041008 | C13H12N4 | 1.1732 | 17.1293 | ↑** | - | - | - |
| 4.1114 | 336.0721 | 3-Indole carboxylic acid glucuronide | HMDB0013189 | C15H15NO8 | 1.5871 | 8.2004 | ↑** | 1.1438 | 0.4085 | ↓# |
| 4.2432 | 283.0819 | p-Cresol glucuronide | HMDB0011686 | C13H16O7 | 1.1126 | 1.7404 | ↑** | - | - | - |
| 4.3097 | 479.0647 | 3-{7-[(6-carboxy-3,4,5-trihydroxyoxan-2-yl)oxy]-3-hydroxy-  5-sulfino-3,4-dihydro-2H-1-benzopyran-2-yl}benzen-1-olate | HMDB0127814 | C21H22O12S | 1.5536 | 112.0222 | ↑** | 1.1381 | 0.2934 | ↓# |
| 4.3771 | 399.1291 | 3,4,5-trihydroxy-6-{[5-(4-hydroxy-3-methoxyphenyl)-  pentanoyl]oxy}oxane-2-carboxylic acid | HMDB0127791 | C18H24O10 | 1.3532 | 6.5013 | ↑** | - | - | - |
| 4.3771 | 241.1075 | 11-oxo-undeca-5,9-dienoic acid | LMFA01060221 | C11H16O3 | 2.2182 | 0.7609 | ↓* | - | - | - |
| 4.4003 | 337.0385 | [3-(3,7-dihydroxy-3,4-dihydro-2H-1-benzopyran-  2-yl)phenyl]oxidanesulfonic acid | HMDB0135131 | C15H14O7S | 1.3414 | 0.2735 | ↓** | - | - | - |
| 4.4221 | 240.1024 | 2-Phenylethyl 2-aminobenzoate | HMDB0037696 | C15H15NO2 | 1.0283 | 2.6393 | ↑** | - | - | - |
| 4.5341 | 279.0805 | 8-Deoxy-11-hydroxy-13-chlorogrosheimin | HMDB0041037 | C15H19ClO4 | 1.1073 | 6.3403 | ↑** | - | - | - |
| 4.5565 | 405.2126 | Kiwiionoside | HMDB0038691 | C19H34O9 | 1.9107 | 3.5642 | ↑* | - | - | - |
| 4.5565 | 425.1449 | 3,4,5-trihydroxy-6-({2-hydroxy-3-[4-hydroxy-3-(3-methylbut-  2-en-1-yl)phenyl]propanoyl}oxy)oxane-2-carboxylic acid | HMDB0133207 | C20H26O10 | 1.8513 | 8.0008 | ↑** | 1.2404 | 0.2947 | ↓## |
| 4.5565 | 365.2327 | 1(15),8(19)-Trinervitadiene-3alpha,5alpha,18-triol | LMPR0104400001 | C20H32O3 | 1.1612 | 69.3574 | ↑** | - | - | - |
| 4.6930 | 929.4980 | Angiotensin III | HMDB0001036 | C46H66N12O9 | 1.0355 | 0.2107 | ↓** | - | - | - |
| 4.7585 | 539.2488 | Tetrahydroaldosterone-3-glucuronide | HMDB0010357 | C27H40O11 | 1.0845 | 1102.0420 | ↑* | - | - | - |
| 4.7818 | 347.1008 | Ridogrel | HMDB0015338 | C18H17F3N2O3 | 1.2188 | 87527010.0000 | ↑** | - | - | - |
| 4.8043 | 427.1606 | ROSAVIN | 85001 | C20H28O10 | 1.6892 | 2.6132 | ↑* | - | - | - |
| 4.8275 | 365.2327 | (-)-16alpha,17-Dihydroxy-atisan-3-one | LMPR0104150005 | C20H32O3 | 1.2179 | 5.0039 | ↑** | - | - | - |
| 4.8499 | 453.1762 | alpha-CEHC glucuronide | HMDB0062445 | C22H30O10 | 1.1048 | 2.1691 | ↑** | - | - | - |
| 4.8731 | 613.3001 | Coagulin R 3-glucoside | HMDB0033207 | C34H48O11 | 1.7976 | 7039.5610 | ↑** | 1.3968 | 0.4823 | ↓# |
| 4.9417 | 351.0539 | 3-hydroxy-2-(3-methoxyphenyl)-7-(sulfinooxy)-  3,4-dihydro-2H-1-benzopyran-5-olate | HMDB0127820 | C16H16O7S | 1.1036 | 0.4273 | ↓* | - | - | - |
| 4.9652 | 255.1135 | Imazamethabenz | HMDB0034885 | C15H18N2O3 | 1.1797 | 9.5461 | ↑** | - | - | - |
| 4.9652 | 367.2485 | Austroinulin | HMDB0036802 | C20H34O3 | 1.0091 | 112000000.0000 | ↑* | - | - | - |
| 4.9869 | 497.1821 | 3,4,5-trihydroxy-6-{4-[1-hydroxy-3-(5-methoxy-2,2-dimethyl  -2H-chromen-6-yl)propyl]phenoxy}oxane-2-carboxylic acid | HMDB0125905 | C27H32O10 | 1.0419 | 114.6474 | ↑** | - | - | - |
| 5.0772 | 241.1440 | Dihydro-5-(2-octenyl)-2(3H)-furanone | HMDB0030867 | C12H20O2 | 1.7976 | 0.0579 | ↓** | 1.3148 | 0.0898 | ↓# |
| 5.1474 | 509.2386 | Dehydroisoandrosterone 3-glucuronide | HMDB0010327 | C25H36O8 | 1.4550 | 456000000.0000 | ↑* | - | - | - |
| 5.3281 | 537.2701 | Erinacine P | HMDB0036313 | C27H40O8 | 1.3114 | 133000000.0000 | ↑* | - | - | - |
| 5.4418 | 478.3169 | Lithocholic acid glycine conjugate | HMDB0000698 | C26H43NO4 | 1.7724 | 15.9005 | ↑** | 1.1614 | 4.9283 | ↑# |
| 5.4418 | 238.1079 | 2-Methylpropyl 2-aminobenzoate | HMDB0035072 | C11H15NO2 | 1.5820 | 0.1010 | ↓** | 1.1186 | 0.4137 | ↓# |
| 5.5781 | 393.2642 | Butaprost (free acid) | 45591 | C23H38O5 | 1.3512 | 42.0106 | ↑** | - | - | - |
| 5.6009 | 269.1028 | Dhelwangin | HMDB0030703 | C12H16O4 | 1.1221 | 0.4071 | ↓** | - | - | - |
| 5.6009 | 379.2484 | Asterogenol | LMST02030211 | C21H34O3 | 2.0755 | 7.7142 | ↑** | 1.2785 | 0.2260 | ↓## |
| 5.6217 | 367.2122 | Thromboxane B3 | HMDB0005099 | C20H32O6 | 2.1206 | 0.2531 | ↓* | 1.0240 | 0.3166 | ↓## |
| 5.6897 | 514.2835 | Candoxatril | HMDB0014754 | C29H41NO7 | 1.3574 | 8.1306 | ↑** | - | - | - |
| 5.6897 | 644.2415 | Acarbose | HMDB0014429 | C25H43NO18 | 1.2171 | 10.9724 | ↑* | - | - | - |
| 5.7122 | 185.1173 | 3,10-dihydroxydecanoic acid | LMFA01050429 | C10H20O4 | 1.9278 | 1.8729 | ↑** | 1.3518 | 0.7738 | ↓## |
| 5.7342 | 677.3184 | Olitorin | HMDB0034361 | C35H52O14 | 1.6382 | 2790000000.0000 | ↑** | 1.3964 | 0.4936 | ↓# |
| 5.8263 | 460.2700 | Bimatoprost | HMDB0015041 | C25H37NO4 | 1.2464 | 0.0386 | ↓* | - | - | - |
| 5.8487 | 697.3445 | Uzarigenin 3-[xylosyl-(1->2)-rhamnoside] | HMDB0036296 | C34H52O12 | 1.0391 | 1200000000.0000 | ↑** | - | - | - |
| 5.8487 | 389.1714 | Metyrosine | HMDB0014903 | C10H13NO3 | 1.3301 | 195.3946 | ↑** | - | - | - |
| 5.8487 | 679.3340 | (3b,20R,22R)-3,20,27-Trihydroxy-1-oxowitha  -5,24-dienolide 3-glucoside | HMDB0033573 | C34H50O11 | 1.5908 | 14378.4100 | ↑** | 1.3398 | 0.4939 | ↓# |
| 5.8941 | 523.3268 | Dolicholide | HMDB0034086 | C28H46O6 | 1.7983 | 0.4135 | ↓** | 1.2463 | 2.6194 | ↑# |
| 5.9400 | 321.1703 | Ginsenoyne C | HMDB0038994 | C17H24O3 | 1.7260 | 2.7611 | ↑** | 1.1680 | 0.4988 | ↓# |
| 5.9626 | 277.1441 | α-CEHC | 44825 | C16H22O4 | 1.7048 | 1.6249 | ↑* | - | - | - |
| 6.0087 | 543.2625 | Physagulin F | HMDB0039631 | C30H40O9 | 1.1266 | 4.6500 | ↑** | - | - | - |
| 6.0313 | 291.1235 | Coriandrone A | HMDB0037774 | C16H20O5 | 2.2950 | 2.0864 | ↑** | 1.2130 | 0.4089 | ↓## |
| 6.1233 | 321.1240 | Ketophenylbutazone | HMDB0041914 | C19H18N2O3 | 1.2254 | 747000000.0000 | ↑** | - | - | - |
| 6.2622 | 241.1440 | Aleprylic acid | LMFA01030189 | C12H20O2 | 1.0096 | 1.6260 | ↑* | - | - | - |
| 6.3540 | 535.2218 | Glimepiride | HMDB0014367 | C24H34N4O5S | 1.0900 | 22.8910 | ↑* | - | - | - |
| 6.3540 | 405.2641 | 2beta,3beta-Dihydroxy-6-oxo-5alpha-cholan-24-oic Acid | LMST04010172 | C24H38O5 | 1.2373 | 16.6433 | ↑* | - | - | - |
| 6.3540 | 548.1709 | 2-amino-4-({1-[(carboxymethyl)-C-hydroxycarbonimidoyl]-2-  {[3-hydroxy-4-(7-methoxy-2-oxo-2H-chromen-8-yl)-2-methylbutan-2-  yl]sulfanyl}ethyl}-C-hydroxycarbonimidoyl)butanoic acid | HMDB0132694 | C25H33N3O10S | 1.0765 | 13.6162 | ↑* | - | - | - |
| 6.3540 | 298.1656 | 2-(3-carboxy-3-(trimethylammonio)propyl)-L-histidine | HMDB0059617 | C13H23N4O4+ | 1.6962 | 3.9462 | ↑** | 1.3218 | 0.5812 | ↓# |
| 6.4941 | 337.2381 | Sterebin E | HMDB0035379 | C20H34O4 | 1.3415 | 110.7035 | ↑** | - | - | - |
| 6.5647 | 626.3107 | S-(11-hydroxy-9-deoxy-delta12-PGD2)-glutathione | HMDB0013055 | C30H51N3O10S | 2.0739 | 0.0290 | ↓** | 1.3181 | 0.1639 | ↓## |
| 6.6572 | 329.2330 | 9,10,18-TriHOME(12) | LMFA02000222 | C18H34O5 | 1.0760 | 0.5227 | ↓** | - | - | - |
| 6.9560 | 361.2592 | 1-O-(2R-hydroxy-4Z-pentadecenyl)-sn-glycerol | LMGL01020054 | C18H36O4 | 1.2196 | 23.7397 | ↑** | - | - | - |
| 7.0018 | 497.3113 | 27-nor-campestan-3beta,4beta,5alpha,6alpha,7beta,  8beta,14alpha,15alpha,24-nonol | LMST01031078 | C27H48O9 | 1.0163 | 8.7099 | ↑** | - | - | - |
| 7.1389 | 641.3182 | Capsianoside I | HMDB0002318 | C32H52O14 | 1.9616 | 612000000.0000 | ↑** | 1.5014 | 0.5429 | ↓## |
| 7.1621 | 511.2542 | 3-alpha-hydroxy-5-alpha-androstane-17-one 3-D-glucuronide | HMDB0010365 | C25H38O8 | 1.0307 | 7.2891 | ↑** | - | - | - |
| 7.2994 | 333.2068 | PGA2 | 3465 | C20H30O4 | 2.1608 | 1.9906 | ↑** | 1.1076 | 0.5798 | ↓## |
| 7.2994 | 291.0660 | Coumarin | HMDB0001218 | C9H6O2 | 2.0028 | 1.1880 | ↑* | - | - | - |
| 7.3226 | 593.1293 | 3''-O-Caffeoylcosmosiin | HMDB0037345 | C30H26O13 | 1.0664 | 1.1682 | ↑* | - | - | - |
| 7.5513 | 347.2223 | Yucalexin B14 | HMDB0036709 | C20H30O2 | 1.1173 | 32806205.0000 | ↑** | - | - | - |
| 7.8944 | 441.2640 | Muzanzagenin | HMDB0032601 | C27H38O5 | 1.2132 | 8.9644 | ↑* | - | - | - |
| 7.9395 | 271.1913 | 5-Tetradecenoic acid | HMDB0000499 | C14H26O2 | 1.0301 | 1.3329 | ↑* | - | - | - |
| 8.0519 | 249.1491 | 3-Benzyl-4-heptanone | HMDB0041482 | C14H20O | 1.3469 | 1.7633 | ↑** | - | - | - |
| 8.1892 | 319.1910 | (Z)-octadeca-9,17-dien-12,14-diyne-1,16-diol | LMFA01050556 | C18H26O2 | 1.4004 | 2.5571 | ↑** | - | - | - |
| 8.2118 | 580.3246 | PC(16:1(9Z)/2:0) | LMGP01010693 | C26H50NO8P | 1.4408 | 3.0359 | ↑** | - | - | - |
| 8.3031 | 399.2172 | 7alpha-Hydroxy-3,12-dioxochola-1,4-dien-24-oic Acid | LMST04010391 | C24H32O5 | 1.2931 | 31623737.0000 | ↑** | - | - | - |
| 8.3265 | 331.1910 | PGA3 | 36189 | C20H28O4 | 1.2451 | 2.8755 | ↑** | - | - | - |
| 8.4653 | 752.5070 | PS(O-16:0/15:0) | LMGP03020005 | C37H74NO9P | 1.2874 | 5.9021 | ↑** | - | - | - |
| 8.4653 | 452.2777 | PC(13:0/0:0) | LMGP01050001 | C21H44NO7P | 1.5261 | 0.7350 | ↓** | 1.1968 | 1.4316 | ↑# |
| 8.5580 | 265.1807 | Tetranor-12(R)-HETE | 35513 | C16H26O3 | 1.1120 | 2.3635 | ↑** | - | - | - |
| 8.5580 | 333.2066 | 15-deoxy-δ-12,14-PGD2 | 36122 | C20H30O4 | 1.2021 | 1.4409 | ↑* | - | - | - |
| 8.7642 | 357.2067 | Canrenoate | 1469 | C22H30O4 | 1.0289 | 6.5905 | ↑** | - | - | - |
| 8.7642 | 335.2224 | 8-iso-PGA1 | 36382 | C20H32O4 | 1.8147 | 1.9530 | ↑** | 1.2420 | 0.6225 | ↓# |
| 8.8778 | 760.5120 | PE(14:0/20:2(11Z,14Z)) | HMDB0008835 | C39H74NO8P | 1.0512 | 4.2053 | ↑** | - | - | - |
| 8.8778 | 329.2329 | Muricatacin | HMDB0038685 | C17H32O3 | 1.1085 | 27.0754 | ↑** | - | - | - |
| 8.9227 | 445.2953 | Pinnasterol | LMST01010283 | C27H42O5 | 1.1007 | 7.7842 | ↑** | - | - | - |
| 8.9227 | 317.2117 | (±)12-HEPE | 36362 | C20H30O3 | 1.7561 | 0.4609 | ↓* | - | - | - |
| 8.9456 | 359.2223 | Neuroprotectin D1 | HMDB0003689 | C22H32O4 | 1.2473 | 2.3636 | ↑** | - | - | - |
| 8.9456 | 543.3045 | 28:2(5Z,9Z)(6Br) | LMFA01030890 | C28H51BrO2 | 1.4026 | 0.7009 | ↓** | - | - | - |
| 8.9456 | 526.3142 | 1-(2-methoxy-6Z-heptadecenyl)-sn-glycero-3-phosphoethanolamine | LMGP02060019 | C23H48NO7P | 1.0634 | 0.6215 | ↓** | - | - | - |
| 9.0597 | 295.2274 | (±)12(13)-EpOME | 43442 | C18H32O3 | 1.6837 | 0.5800 | ↓* | - | - | - |
| 9.1541 | 331.2275 | pregna-5-20-dien-3beta-ol | LMST02030210 | C20H30O | 1.4039 | 0.2701 | ↓* | - | - | - |
| 9.1541 | 229.1803 | 13-hydroxy-tridecanoic acid | LMFA01050042 | C13H26O3 | 1.2528 | 1.8789 | ↑* | - | - | - |
| 9.2473 | 337.2381 | 13,14-Dihydro PGF2a | HMDB0004239 | C20H36O5 | 1.2415 | 2.7868 | ↑** | - | - | - |
| 9.2706 | 363.2538 | 3-undecynoic acid | LMFA01030611 | C11H18O2 | 1.5234 | 3.2515 | ↑** | 1.0794 | 0.5082 | ↓# |
| 9.3164 | 313.2381 | Cyclohexaneundecanoic acid | HMDB0030997 | C17H32O2 | 1.1168 | 1.7486 | ↑* | - | - | - |
| 9.3848 | 540.3300 | LysoPC(16:0) | HMDB0010382 | C24H50NO7P | 1.1425 | 0.8625 | ↓* | - | - | - |
| 9.5187 | 321.2430 | 12(S)-HETrE | HMDB0062747 | C20H34O3 | 2.5346 | 0.5351 | ↓** | 1.1927 | 0.3570 | ↓## |
| 9.5412 | 842.5894 | PE(20:1(11Z)/20:2(11Z,14Z)) | HMDB0009264 | C45H84NO8P | 2.3792 | 0.0899 | ↓** | 4.3157 | 0.2317 | ↑## |
| 9.5877 | 438.2988 | PE(O-16:0/0:0) | LMGP02060002 | C21H46NO6P | 1.9133 | 1.8396 | ↑** | 1.0692 | 0.6706 | ↓## |
| 9.6572 | 327.2537 | 2-methyl-16-heptadecenoic acid | LMFA01020206 | C18H34O2 | 1.1411 | 0.4017 | ↓** | - | - | - |
| 9.7498 | 596.3927 | PC(O-18:0/2:0) | LMGP01020094 | C28H58NO7P | 1.5269 | 2.4011 | ↑** | 1.3802 | 0.6692 | ↓# |
| 9.8905 | 401.2904 | Japanic acid | LMFA01170036 | C21H40O4 | 1.2122 | 53305450.0000 | ↑** | - | - | - |
| 10.1716 | 568.3612 | LysoPC(18:0) | HMDB0010384 | C26H54NO7P | 1.4368 | 0.7943 | ↓** | - | - | - |
| 10.1716 | 508.3395 | LysoPC(17:0) | HMDB0012108 | C25H52NO7P | 1.6760 | 0.6211 | ↓** | 1.291646 | 0.7742 | ↑# |
| 10.2188 | 393.3007 | 5-Heptadecyl-1,3-benzenediol | HMDB0038530 | C23H40O2 | 1.7179 | 1.7150 | ↑* | - | - | - |
| 10.2188 | 385.2955 | 3-oxo-heneicosanoic acid | LMFA01060137 | C21H40O3 | 1.2873 | 53167708.0000 | ↑** | - | - | - |
| 10.2648 | 355.2849 | Prostanoic acid skeleton | LMFA03010000 | C20H38O2 | 1.0821 | 0.7094 | ↓** | - | - | - |
| 10.5423 | 303.2326 | 8,11-eicosadiynoic acid | 24087 | C20H32O2 | 1.8893 | 0.6803 | ↓** | 1.2594 | 0.7834 | ↓## |
| 10.5423 | 317.2117 | 12(R)-HEPE | 36343 | C20H30O3 | 1.0095 | 2.1034 | ↑** | - | - | - |
| 10.9773 | 622.4082 | LysoPC(22:1(13Z)) | HMDB0010399 | C30H60NO7P | 1.0884 | 0.2648 | ↓** | - | - | - |
| 11.0698 | 428.3165 | N-oleoyl phenylalanine | LMFA08020092 | C27H43NO3 | 1.3534 | 2.1067 | ↑* | - | - | - |
| 11.7026 | 430.3321 | N-Stearoyl phenylalanine | HMDB0062342 | C27H45NO3 | 1.8699 | 4.9504 | ↑** | 1.3651 | 0.5545 | ↓## |
| 12.4525 | 840.5747 | PE-NMe2(18:0/20:4(5Z,8Z,11Z,14Z)) | HMDB0113999 | C45H82NO8P | 1.0313 | 0.4900 | ↓* | - | - | - |
| 13.3849 | 619.2878 | 1-Arachidonoylglycerophosphoinositol | HMDB0061690 | C29H49O12P | 1.6264 | 0.3457 | ↓** | 1.4164 | 1.3377 | ↑# |
| 13.4085 | 833.5173 | PI(16:0/18:2(9Z,12Z)) | HMDB0009784 | C43H79O13P | 2.1216 | 2.1241 | ↑** | 1.4700 | 0.6230 | ↓## |
| 13.4085 | 457.2355 | 1-Lyso-2-arachidonoyl-phosphatidate | HMDB0012496 | C23H39O7P | 1.9180 | 0.5765 | ↓** | 1.3286 | 0.5129 | ↓## |

**Note:** *∗P < 0.05, ∗∗P < 0.01 vs.* control group; *#P < 0.05, ##P < 0.01 vs.* model group. Red and green represent the up-regulation and down-regulation of metabolites in Siwu Paste, respectively. "-" was considered not to meet the screening criteria (including: VIP > 1 and *P* < 0.05) for differential metabolites.

**Table S3 The information of AA Metabolic Pathway**

| No. | Pathway name | Total | Hits | Raw *p* | -log *(p)* | Impact |
| --- | --- | --- | --- | --- | --- | --- |
| 1 | Riboflavin metabolism | 4 | 1 | 0.077705 | 1.1096 | 0.5 |
| 2 | Retinol metabolism | 17 | 1 | 0.29196 | 0.53468 | 0.24227 |
| 3 | Sphingolipid metabolism | 21 | 2 | 0.064222 | 1.1923 | 0.19878 |
| 4 | Nicotinate and nicotinamide metabolism | 15 | 1 | 0.26246 | 0.58094 | 0.1943 |
| 5 | Glycerophospholipid metabolism | 36 | 3 | 0.033111 | 1.48 | 0.16842 |
| 6 | Arachidonic acid metabolism | 36 | 2 | 0.1605 | 0.79452 | 0.09399 |
| 7 | Pyrimidine metabolism | 39 | 1 | 0.54969 | 0.25988 | 0.01584 |
| 8 | Tryptophan metabolism | 41 | 3 | 0.046223 | 1.3351 | 0.0139 |
| 9 | Arginine and proline metabolism | 38 | 1 | 0.54027 | 0.26739 | 0.01212 |
| 10 | Pantothenate and CoA biosynthesis | 19 | 1 | 0.32031 | 0.49443 | 0.00714 |
| 11 | Steroid hormone biosynthesis | 85 | 1 | 0.82899 | 0.081451 | 0.00605 |
| 12 | Linoleic acid metabolism | 5 | 1 | 0.096198 | 1.0168 | 0 |
| 13 | Glycine, serine and threonine metabolism | 33 | 2 | 0.13948 | 0.85549 | 0 |
| 14 | Caffeine metabolism | 10 | 1 | 0.18341 | 0.73657 | 0 |
| 15 | alpha-Linolenic acid metabolism | 13 | 1 | 0.23177 | 0.63494 | 0 |
| 16 | Histidine metabolism | 16 | 1 | 0.27735 | 0.55697 | 0 |
| 17 | Ether lipid metabolism | 20 | 1 | 0.33407 | 0.47616 | 0 |

**TableS4 Molecular docking score**

| Molecule name | Docking score (kcal/mol) | | |
| --- | --- | --- | --- |
| GSTP1 | GRB2 | STAT1 |
| Paeoniflorin | -3.90 | -4.07 | -3.89 |
| Betulinic acid | -7.55 | -7.29 | -7.64 |
| Senkyunolide-B | -5.56 | -6.56 | -6.31 |
| cis-Ligustilide | -6.82 | -6.45 | -6.34 |

**Figure S1 QQ plot of Peripheral blood routine data.**

**
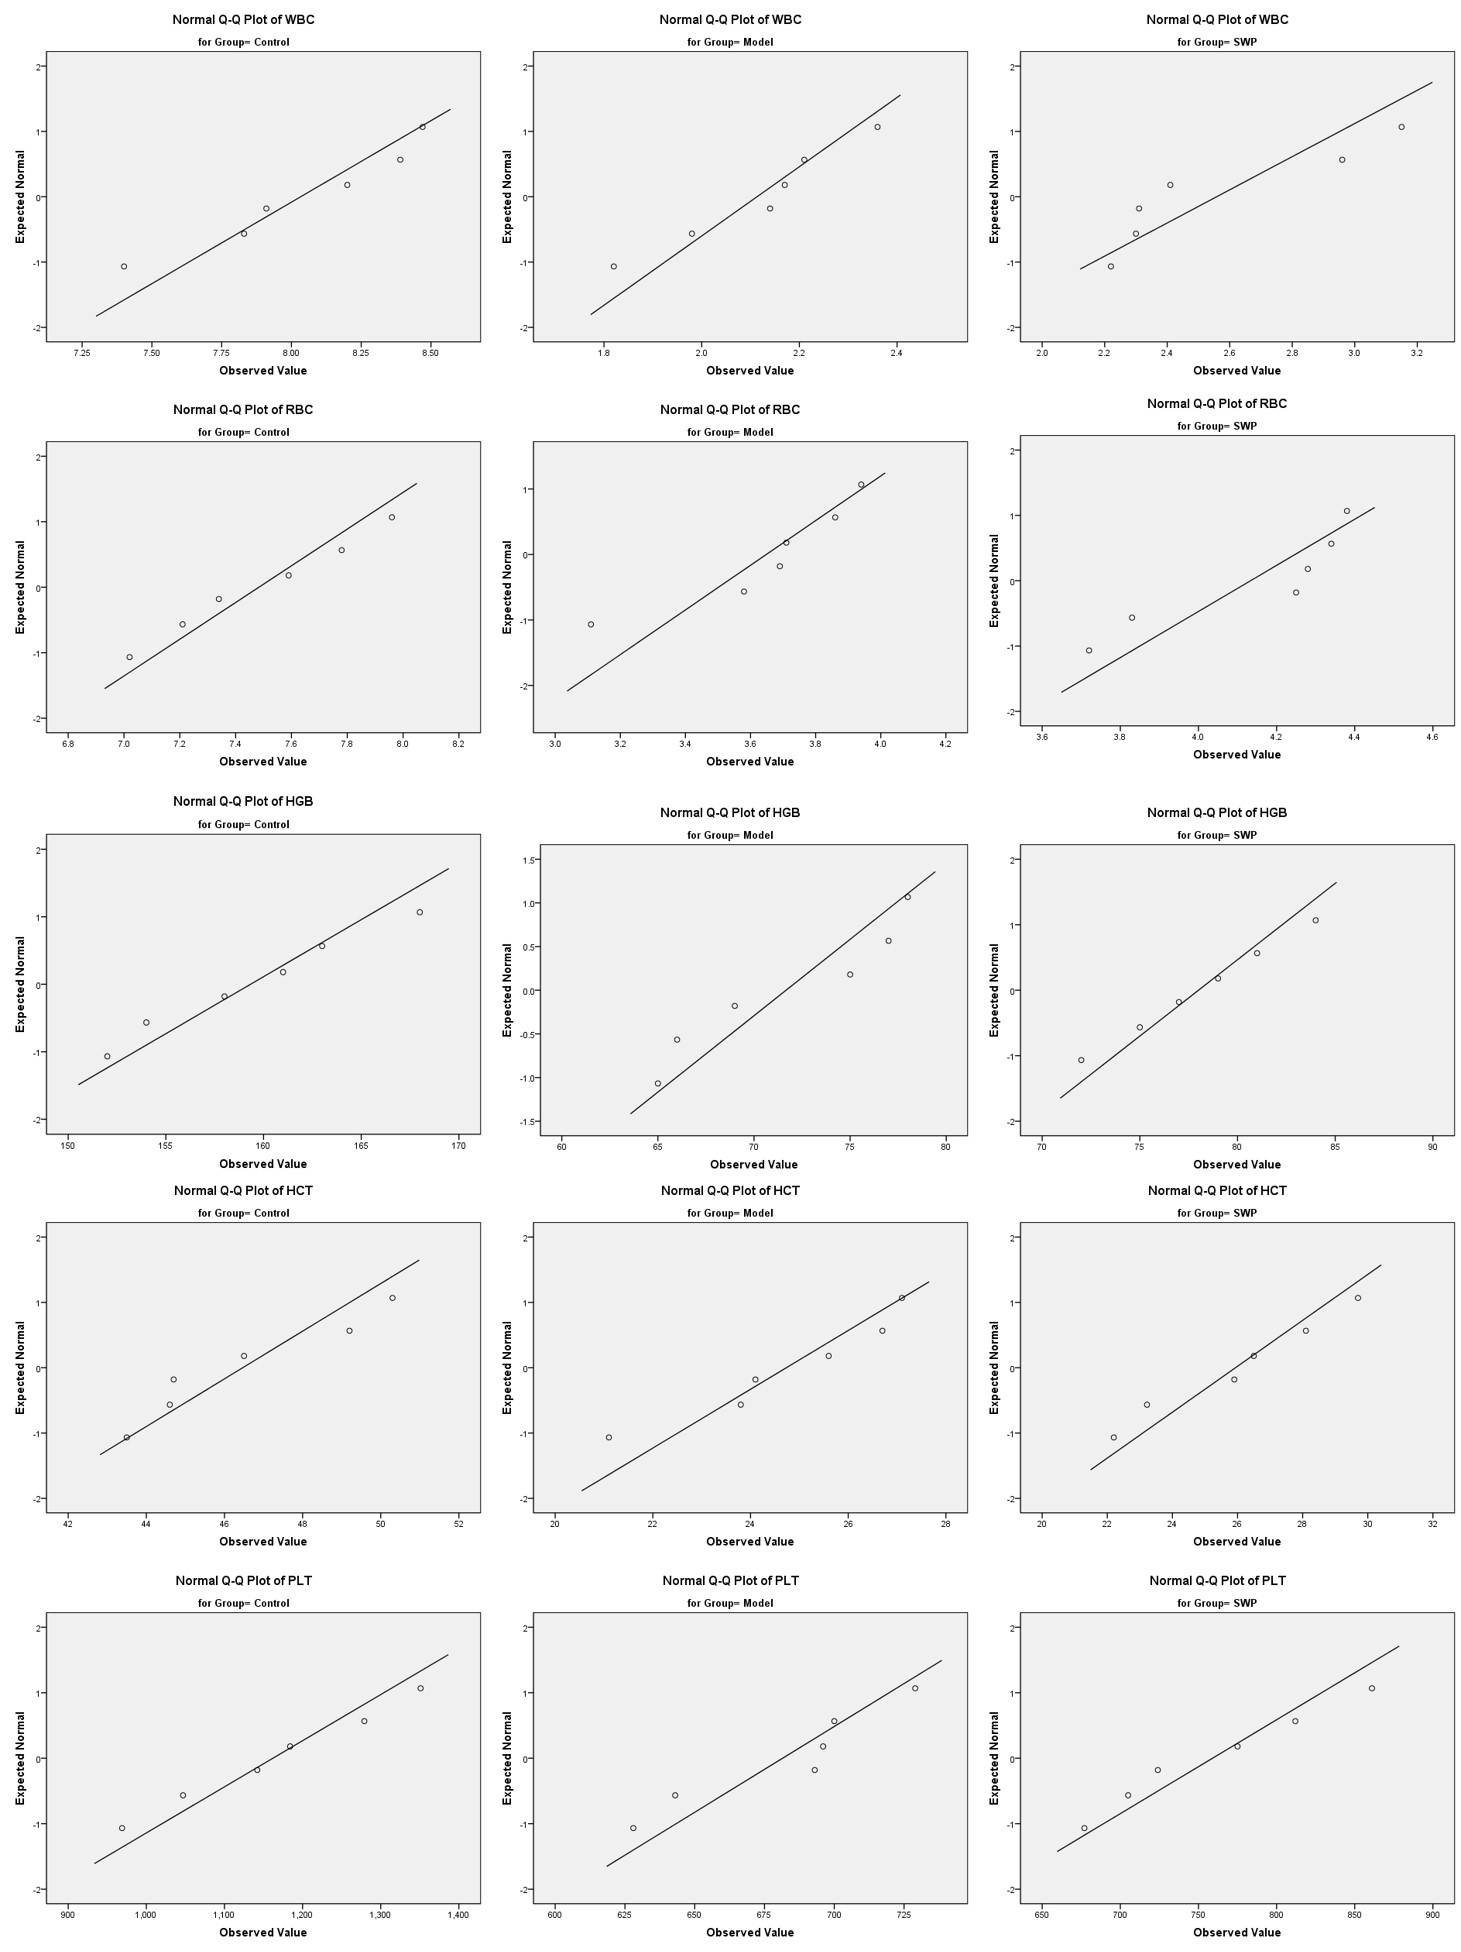
**

**Figure S2 Metabolites profiles of Aplastic Anemia**

RT:

0.00 - 15.00

0

1

2

3

4

5

6

7

8

9

10

11

12

13

14

15

Time (min)

0

5

10

15

20

25

30

35

40

45

50

55

60

65

70

75

80

85

90

95

100

Relative Abundance

9.38

3.31

2.01

10.18

1.38

3.41

9.03

0.84

1.28

9.55

6.87

1.15

13.38

10.00

10.69

11.02

11.22

4.07

6.98

3.91

13.66

11.76

13.72

8.86

11.94

4.13

4.41

7.11

8.73

0.76

12.35

2.46

8.46

12.59

13.93

8.24

7.22

4.88

2.85

6.21

7.91

5.93

6.59

5.05

14.22

0.02

NL: 2.81E9

Base Peak m/z=

60.00-180.00+

205.00-1000.00 F:

FTMS + p ESI Full ms

[66.7000-1000.0000]

MS qc2-6

POS

NEG

**Figure S3 Summary of metabolic pathways analysis.**

**
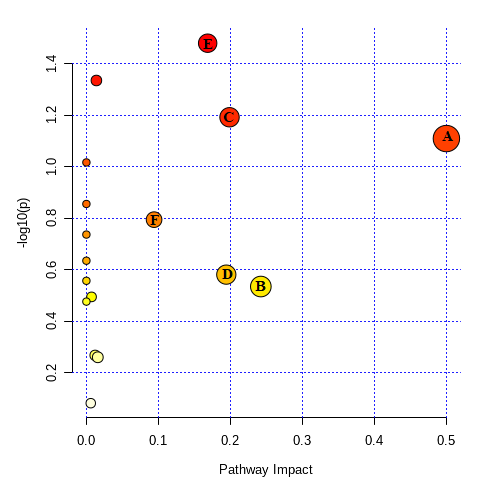
**

**Note:** As shown, 6 important metabolic pathways were identified in 106 differential metabolites regulated by SWP: (A) Riboflavin metabolism, (B) Retinol metabolism, (C) Sphingolipid metabolism, (D) Nicotinate and nicotinamide metabolism, (E) Glycerophospholipid metabolism and (F) Arachidonic acid metabolism.

**Figure S4 QQ plot of WB test data**

**
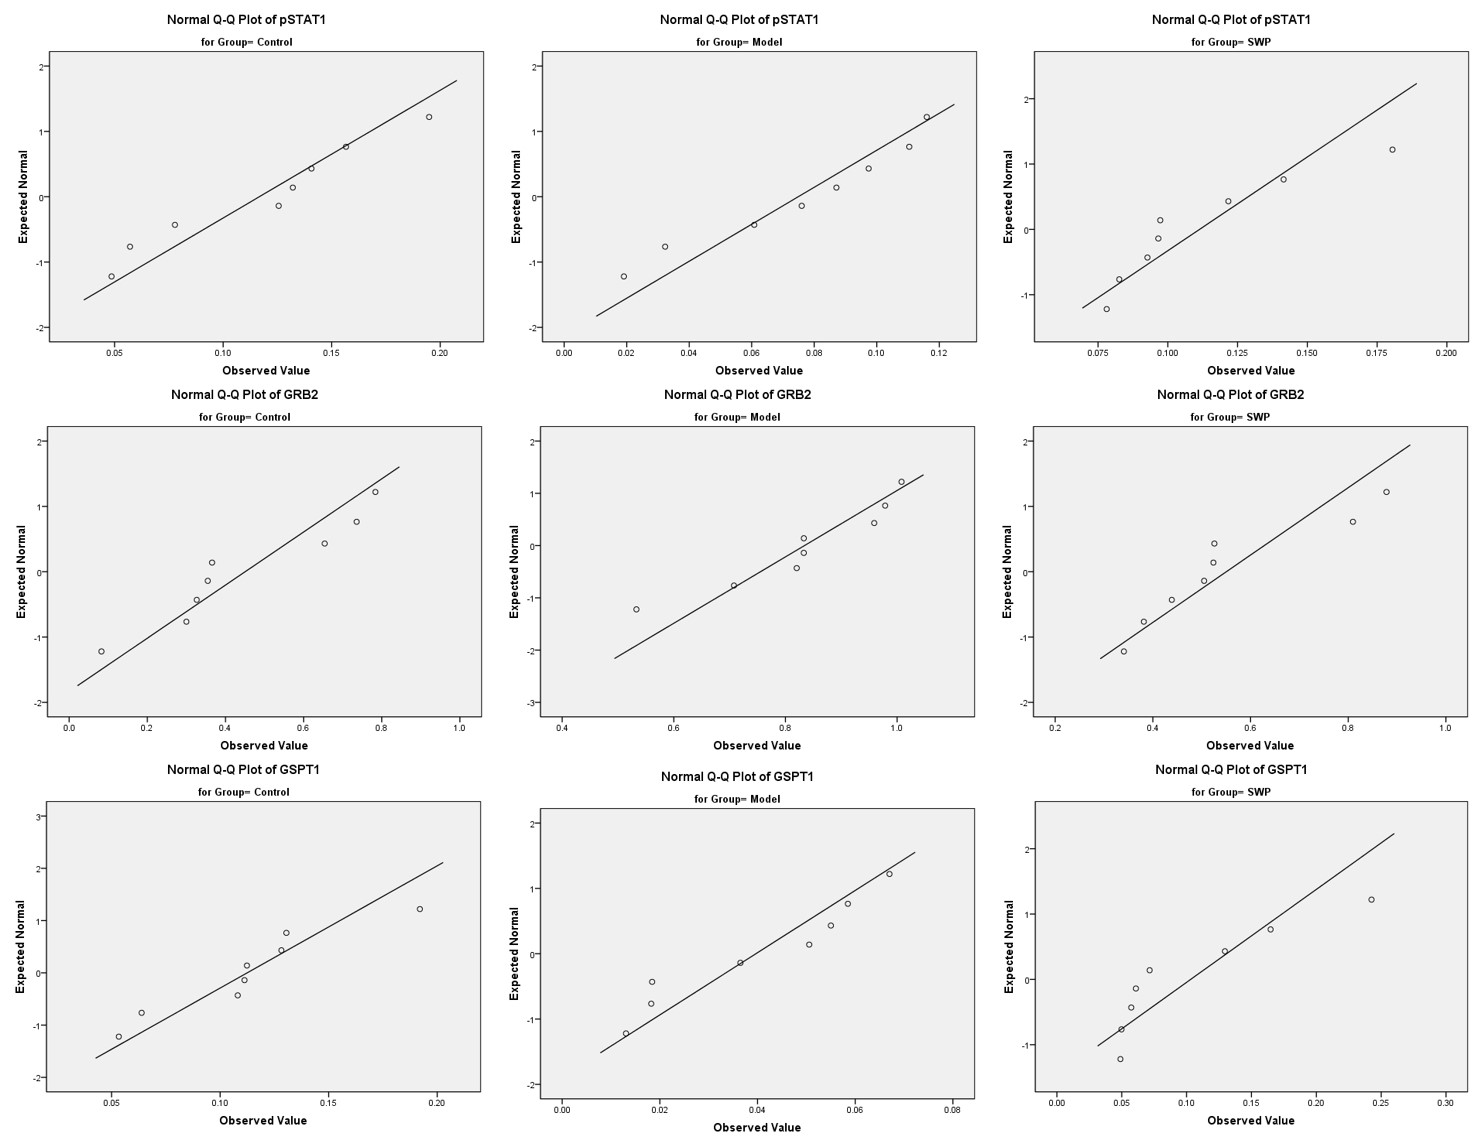
**

**Figure S5 QQ plot of ELISA data**

**
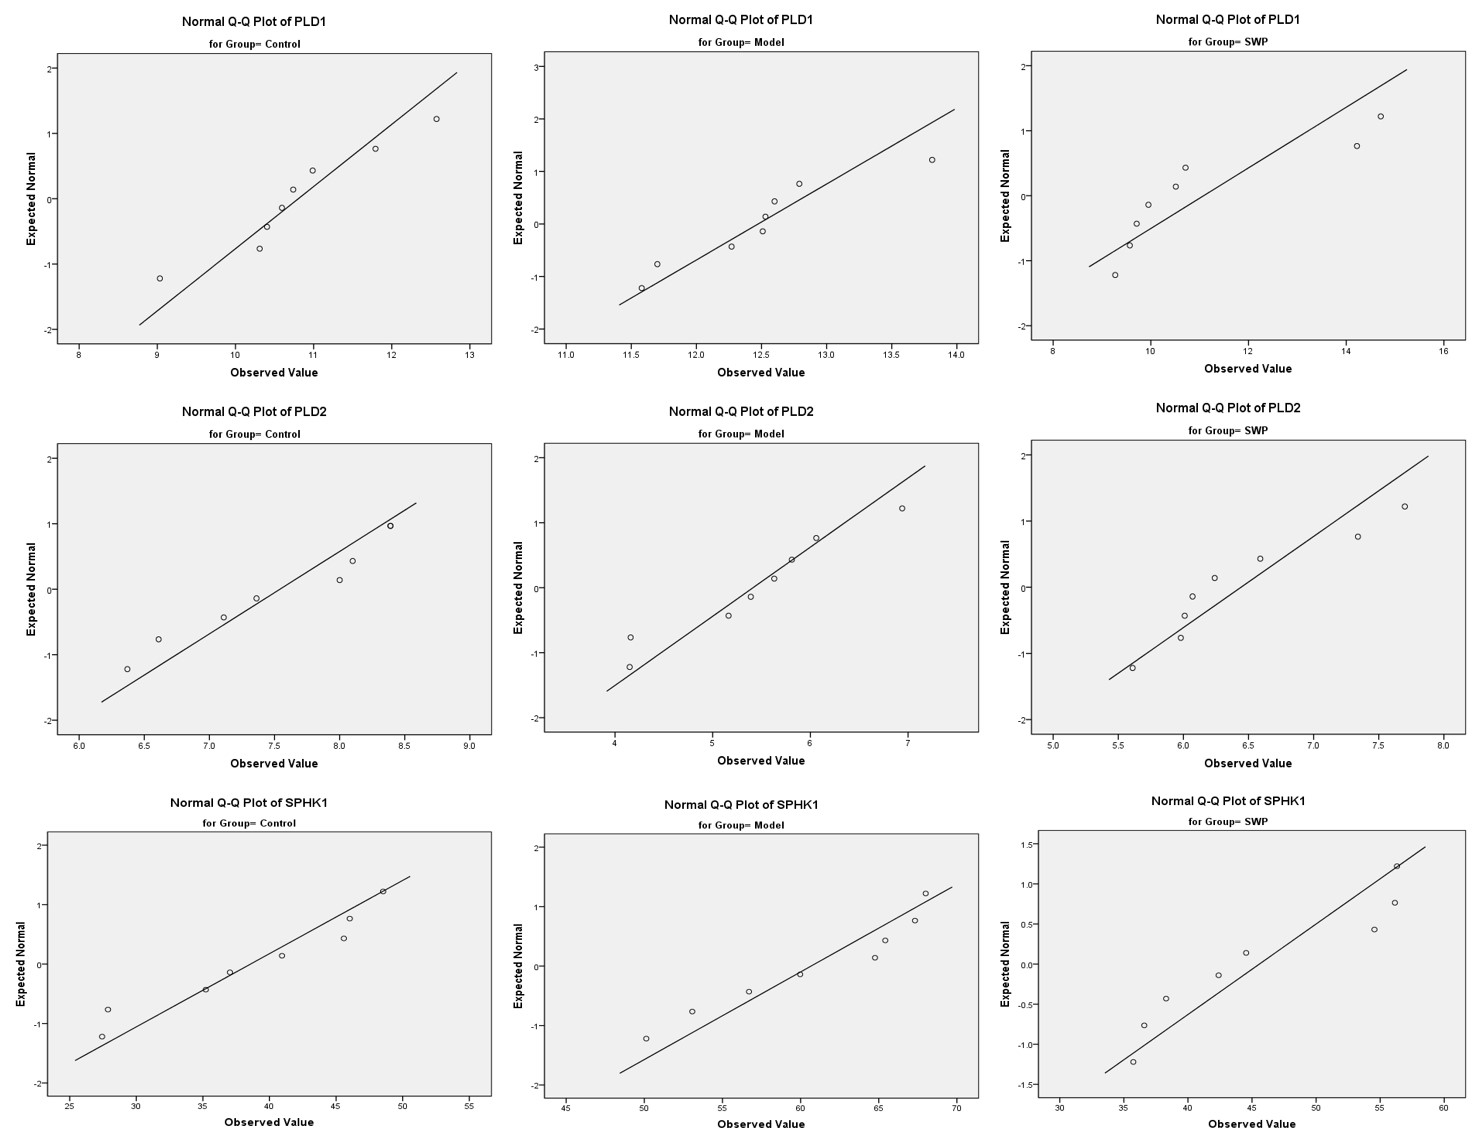
**
